# Supplementary material for: Structure-Function Analysis of Diacylglycerol Acyltransferase Sequences from 70 Organisms
Source: Springer Nature journal article supplement (doi:10.1186/1756-0500-4-249), 2011-07-21
Supplement: 13104_2011_1001_MOESM2_ESM.pdf [file 13104_2011_1001_MOESM2_ESM.pdf]

A

AaDGAT1-XP\_001658299(236)
DmDGAT1-NP\_609813.1(317)
MmDGAT1-NP\_995724.1(367)
TcDGAT1-XP\_975142.1(244)
BdDGAT1-AAZ22403.1(409)
BdDGAT1-NP\_777118.2(409)
OaDGAT1-NP\_001103634.1(248)
ChDGAT1-ABD59375.1(243)
SdDGAT1-NP\_999216.1(414)
CfdGAT1-XP\_849176.1(257)
CfdGAT1-XP\_858062.1(238)
HsDGAT1-NP\_036211.2(247)
MmDGAT1-XP\_001090134.1(250)
PcDGAT1-XP\_520014.2(249)
MmDGAT1-NP\_034176.1(258)
RnDGAT1-NP\_445889.1(258)
OcDGAT1-XP\_002724427.1(262)
MmDGAT1-XP\_001371565.1(390)
DrDGAT1-NP\_001002458.1(263)
DrDGAT1-NP\_956024.1(256)
SkDGAT1-XP\_002736160.1(240)
AdDGAT1-NP\_179535.1(280)
BjDGAT1-AA40784.1(263)
BnDGAT1-AA40536.1(263)
BnDGAT2-AA40881.1(261)
BnDGAT2-AA40785.1(263)
TmDGAT1-AA03340.2(279)
EaDGAT1-AAV31083.1(266)
JcDGAT1-AB884383.1(278)
VfDGAT1-DQ356680.1(283)
RcDGAT1-XP\_002514132.1(282)
PdDGAT1-XP\_002308278.1(209)
PdDGAT1-XP\_002330510.1(250)
VvDGAT1-XP\_002279345.1(274)
GmDGAT1-AA578662.1(257)
GmDGAT1-BAE93461.1(263)
LjDGAT1-AAW51456.1(268)
MdDGAT1-ABN09107.1(298)
EpDGAT1-ACO55635.1(232)
OeDGAT1-AA501606.1(291)
PfdGAT1-AA223696.1(293)
NfDGAT1-AAF19345.1(291)
SmDGAT1-XP\_002964165.1(319)
VgDGAT1-ABV21945.1(282)
SbDGAT1-XP\_002437165.1(248)
ZmDGAT1-2-EU039830(252)
PpDGAT1-XP\_001770929.1(207)
OsDGAT1-NP\_001054869.2(297)
SbDGAT1-XP\_002439419.1(274)
CvDGAT1-EFN50697.1(284)
PdDGAT1-XP\_002177753.1(276)
DdDGAT1-XP\_645633.2(364)
PpDGAT1-EF8A5004.1(351)
AcDGAT2-EG041804.1(265)
PbDGAT1-EEH17170.1(258)
AodGAT2-EEQ31683.1(259)
MadGAT2-EFY87744.1(230)
MadGAT2-EFY97444.1(259)
TgDGAT1-AA94209.1(282)
AcDGAT2-XP\_003225477.1(266)
BdGAT2-DAA21853.1(246)
MmDGAT2-NP\_080660.1(327)
RnDGAT2-NP\_001012345.1(190)
HsDGAT2-AAQ88996.1(327)
PaDGAT2-XP\_002822304.1(273)
MdGAT2-NP\_989372.1(300)
DrDGAT2-NP\_001025367.1(163)
IpDGAT2-NP\_001188005.1(163)
BdGAT2-XP\_875499.3(208)
HsDGAT2-NP\_835470.1(143)
PdGAT2-XP\_527842.2(143)
OaDGAT2-XP\_001518899.1(47)
DdDGAT2-XP\_635762.1(134)
PpDGAT2-EF8A8364.1(134)
NvDGAT2-XP\_001630435.1(140)
NvDGAT2-XP\_001633322.1(141)
NvDGAT2-XP\_001635548.1(116)
BdGAT2-XP\_002683800.1(106)
TgDGAT2-XP\_002187643.1(138)
MdGAT2-XP\_001365685.1(138)
CfdGAT2-XP\_002120879.1(138)
CeDGAT2-NP\_505413.1(152)
CeDGAT2-NP\_872180.1(142)
AgDGAT2-NP\_983542.1(265)
ScDGAT2-NP\_014888.1(222)
SpDGAT2-XP\_001713160.1(148)
TcDGAT2-XP\_975146.1(143)
OaDGAT2-XP\_001694904.1(140)
OaDGAT2-XP\_001693189.1(136)
OaDGAT2-EFN51306.1(135)
OaDGAT2-XP\_003083539.1(217)
PdDGAT2-XP\_001758758.1(210)
PdDGAT2-XP\_00177726.1(206)
SmDGAT2-XP\_002972054.1(237)
PdDGAT2-ABK26256.1(225)
SpDGAT2-AAQ89590.1(219)
EoDGAT2-ACO35365.1(144)
HvDGAT2-BA85730.1(230)
OsDGAT2-NP\_001057530(237)
OsDGAT2-NP\_001047917(235)
SbDGAT2-XP\_002452652.1(231)
ZmDGAT2-NP\_001150174.1(230)
AdGAT2a-AC090187(214)
BnDGAT2b-AC090188(214)
VvDGAT2-XP\_002263626(234)
EaDGAT2-ADF57328.1(228)
GmDGAT2-AQU20344.1(214)
MmDGAT2-AC084867.1(218)
HsDGAT2-ABU50328.1(233)
OeDGAT2-ADG22608.1(132)
PdGAT2-XP\_002317635.1(162)
RcDGAT2-XP\_002528531.1(157)
VgDGAT2-ACV40232.1(153)
VfDGAT2-DG356682(139)
UhdGAT2-AAK84179.1(155)
UhdGAT2B-AAK84180.1(148)
Consensus(476)
V L L Y F F A P T L Y L Y S I R R L R L R

B

AaDGAT1-XP\_001658299(338)
DmDGAT1-NP\_609813.1(419)
MmDGAT1-NP\_995724.1(469)
TcDGAT1-XP\_975142.1(346)
BdDGAT1-AAZ22403.1(350)
BdDGAT1-NP\_777118.2(350)
OaDGAT1-NP\_001103634.1(350)
ChDGAT1-ABD59375.1(243)
SdDGAT1-NP\_999216.1(350)
CfdGAT1-XP\_849176.1(359)
CfdGAT1-XP\_858062.1(366)
HsDGAT1-NP\_036211.2(349)
MmDGAT1-XP\_001090134.1(352)
PcDGAT1-XP\_520014.2(349)
MmDGAT1-NP\_034176.1(360)
RnDGAT1-NP\_445889.1(360)
OcDGAT1-XP\_002724427.1(364)
MmDGAT1-XP\_001371565.1(492)
DrDGAT1-NP\_001002458.1(365)
DrDGAT1-NP\_956024.1(358)
SkDGAT1-XP\_002736160.1(342)
AdDGAT1-NP\_179535.1(381)
BjDGAT1-AA40784.1(364)
BnDGAT1-AA40536.1(364)
BnDGAT2-AA40881.1(202)
BnDGAT2-AA40785.1(364)
TmDGAT1-AA03340.2(380)
EaDGAT1-AAV31083.1(379)
JcDGAT1-AB884383.1(379)
VfDGAT1-DQ356680.1(384)
RcDGAT1-XP\_002514132.1(383)
PdDGAT1-XP\_002308278.1(310)
PdDGAT1-XP\_002330510.1(351)
VvDGAT1-XP\_002279345.1(375)
GmDGAT1-AA578662.1(358)
GmDGAT1-BAE93461.1(364)
LjDGAT1-AAW51456.1(369)
MdDGAT1-ABN09107.1(399)
EpDGAT1-ACO55635.1(333)
OeDGAT1-AA501606.1(392)
PfdGAT1-AA223696.1(394)
NfDGAT1-AAF19345.1(392)
SmDGAT1-XP\_002964165.1(280)
VgDGAT1-ABV21945.1(383)
SbDGAT1-XP\_002437165.1(349)
ZmDGAT1-2-EU039830(353)
PpDGAT1-XP\_001770929.1(308)
OsDGAT1-NP\_001054869.2(398)
SbDGAT1-XP\_002439419.1(375)
CvDGAT1-EFN50697.1(284)
PdDGAT1-XP\_002177753.1(276)
DdDGAT1-XP\_645633.2(466)
PpDGAT1-EF8A5004.1(453)
AcDGAT2-EG041804.1(367)
PbDGAT1-EEH17170.1(360)
AodGAT2-EEQ31683.1(361)
MadGAT2-EFY87744.1(332)
MadGAT2-EFY97444.1(361)
TgDGAT1-AA94209.1(390)
AcDGAT2-XP\_003225477.1(266)
BdGAT2-DAA21853.1(246)
MmDGAT2-NP\_080660.1(273)
RnDGAT2-NP\_001012345.1(273)
HsDGAT2-AAQ88996.1(273)
PaDGAT2-XP\_002822304.1(273)
MdGAT2-NP\_989372.1(246)
DrDGAT2-NP\_001025367.1(246)
IpDGAT2-NP\_001188005.1(246)
BdGAT2-XP\_875499.3(291)
HsDGAT2-NP\_835470.1(226)
PdGAT2-XP\_527842.2(226)
OaDGAT2-XP\_001518899.1(132)
DdDGAT2-XP\_635762.1(216)
PpDGAT2-EF8A8364.1(216)
NvDGAT2-XP\_001630435.1(223)
NvDGAT2-XP\_001633322.1(224)
NvDGAT2-XP\_001635548.1(199)
BdGAT2-XP\_002683800.1(189)
TgDGAT2-XP\_002187643.1(221)
MdGAT2-XP\_001365685.1(221)
OaDGAT2-XP\_002120879.1(221)
CeDGAT2-NP\_505413.1(235)
CeDGAT2-NP\_872180.1(225)
AgDGAT2-NP\_983542.1(346)
ScDGAT2-NP\_014888.1(303)
SpDGAT2-XP\_001713160.1(230)
PdGAT2-XP\_975146.1(226)
OaDGAT2-XP\_001694904.1(221)
OaDGAT2-XP\_001693189.1(216)
CvDGAT2-EFN51306.1(135)
OaDGAT2-XP\_003083539.1(217)
PdDGAT2-XP\_001758758.1(210)
PdDGAT2-XP\_00177726.1(206)
SmDGAT2-XP\_002972054.1(237)
PdDGAT2-ABK26256.1(225)
SpDGAT2-AAQ89590.1(219)
EoDGAT2-ACO35365.1(224)
HvDGAT2-BA85730.1(230)
OsDGAT2-NP\_001057530(237)
OsDGAT2-NP\_001047917(235)
SbDGAT2-XP\_002452652.1(231)
ZmDGAT2-NP\_001150174.1(230)
AdGAT2a-AC090187(214)
BnDGAT2b-AC090188(214)
VvDGAT2-XP\_002263626(234)
EaDGAT2-ADF57328.1(228)
GmDGAT2-AQU20344.1(214)
MmDGAT2-AC084867.1(218)
HsDGAT2-ABU50328.1(233)
OeDGAT2-ADG22608.1(132)
PdGAT2-XP\_002317635.1(162)
RcDGAT2-XP\_002528531.1(157)
VgDGAT2-ACV40232.1(235)
VfDGAT2-DG356682(219)
UhdGAT2-AAK84179.1(238)
UhdGAT2B-AAK84180.1(230)
Consensus(610)
L A E V F G D E F Y K D W W

C

AaDGAT1-XP\_001658299(397)
DmDGAT1-NP\_609813.1(478)
MmDGAT1-NP\_995724.1(528)
TcDGAT1-XP\_975142.1(405)
BdDGAT1-AAZ22403.1(409)
BdDGAT1-NP\_777118.2(409)
OaDGAT1-NP\_001103634.1(409)
ChDGAT1-ABD59375.1(302)
SdDGAT1-NP\_999216.1(409)
CfdGAT1-XP\_849176.1(418)
CfdGAT1-XP\_858062.1(425)
HsDGAT1-NP\_036211.2(408)
MmDGAT1-XP\_001090134.1(411)
PcDGAT1-XP\_520014.2(408)
MmDGAT1-NP\_034176.1(419)
RnDGAT1-NP\_445889.1(419)
OcDGAT1-XP\_002724427.1(423)
MmDGAT1-XP\_001371565.1(551)
DrDGAT1-NP\_001002458.1(424)
DrDGAT1-NP\_956024.1(417)
SkDGAT1-XP\_002736160.1(401)
AdDGAT1-NP\_179535.1(440)
BjDGAT1-AA40784.1(423)
BnDGAT1-AA40536.1(423)
BnDGAT2-AA40881.1(261)
BnDGAT2-AA40785.1(423)
TmDGAT1-AA03340.2(439)
EaDGAT1-AAV31083.1(426)
JcDGAT1-AB884383.1(438)
VfDGAT1-DQ356680.1(443)
RcDGAT1-XP\_002514132.1(442)
PdDGAT1-XP\_002308278.1(369)
PdDGAT1-XP\_002330510.1(410)
VvDGAT1-XP\_002279345.1(434)
GmDGAT1-AA578662.1(417)
GmDGAT1-BAE93461.1(423)
LjDGAT1-AAW51456.1(428)
MdDGAT1-ABN09107.1(458)
EpDGAT1-ACO55635.1(392)
OeDGAT1-AA501606.1(451)
PfdGAT1-AA223696.1(453)
NfDGAT1-AAF19345.1(451)
SmDGAT1-XP\_002964165.1(339)
VgDGAT1-ABV21945.1(442)
SbDGAT1-XP\_002437165.1(408)
ZmDGAT1-2-EU039830(412)
PpDGAT1-XP\_001770929.1(367)
OsDGAT1-NP\_001054869.2(457)
SbDGAT1-XP\_002439419.1(434)
CvDGAT1-EFN50697.1(343)
PdDGAT1-XP\_002177753.1(335)
DdDGAT1-XP\_645633.2(525)
PpDGAT1-EF8A5004.1(512)
AcDGAT2-EG041804.1(426)
PbDGAT1-EEH17170.1(419)
AodGAT2-EEQ31683.1(420)
MadGAT2-EFY87744.1(391)
MadGAT2-EFY97444.1(420)
TgDGAT1-AA94209.1(449)
AcDGAT2-XP\_003225477.1(320)
BdGAT2-DAA21853.1(300)
MmDGAT2-NP\_080660.1(327)
RnDGAT2-NP\_001012345.1(327)
HsDGAT2-AAQ88996.1(327)
PaDGAT2-XP\_002822304.1(327)
MdGAT2-NP\_989372.1(300)
DrDGAT2-NP\_001025367.1(300)
IpDGAT2-NP\_001188005.1(300)
BdGAT2-XP\_875499.3(345)
HsDGAT2-NP\_835470.1(280)
PdGAT2-XP\_527842.2(280)
OaDGAT2-XP\_001518899.1(186)
DdDGAT2-XP\_635762.1(269)
PpDGAT2-EF8A8364.1(269)
NvDGAT2-XP\_001630435.1(276)
NvDGAT2-XP\_001633322.1(277)
NvDGAT2-XP\_001635548.1(252)
BdGAT2-XP\_002683800.1(236)
TgDGAT2-XP\_002187643.1(274)
MdGAT2-XP\_001365685.1(274)
OaDGAT2-XP\_002120879.1(274)
CeDGAT2-NP\_505413.1(288)
CeDGAT2-NP\_872180.1(278)
AgDGAT2-NP\_983542.1(399)
ScDGAT2-NP\_014888.1(356)
SpDGAT2-XP\_001713160.1(283)
TcDGAT2-XP\_975146.1(276)
PpDGAT2-XP\_001694904.1(261)
PpDGAT2-XP\_001693189.1(264)
CvDGAT2-EFN51306.1(167)
OaDGAT2-XP\_003083539.1(265)
PdDGAT2-XP\_001758758.1(253)
PdDGAT2-XP\_00177726.1(249)
SmDGAT2-XP\_002972054.1(280)
PdDGAT2-ABK26256.1(268)
SpDGAT2-AAQ89590.1(262)
EoDGAT2-ACO35365.1(267)
HvDGAT2-BA85730.1(273)
OsDGAT2-NP\_001057530(280)
OsDGAT2-NP\_001047917(278)
SbDGAT2-XP\_002452652.1(274)
ZmDGAT2-NP\_001150174.1(273)
AdGAT2a-AC090187(257)
BnDGAT2b-AC090188(257)
VvDGAT2-XP\_002263626(277)
EaDGAT2-ADF57328.1(271)
GmDGAT2-AQU20344.1(257)
MmDGAT2-A084867.1(261)
HsDGAT2-ABU50328.1(276)
OeDGAT2-ADG22608.1(275)
PdGAT2-XP\_002317635.1(205)
RcDGAT2-XP\_002528531.1(280)
VgDGAT2-ACV40232.1(278)
VfDGAT2-DG356682(262)
UhdGAT2-AAK84179.1(291)
UhdGAT2B-AAK84180.1(283)
Consensus(669)
F L S A H E V V V G V I V A P L

Consensus(476)

Consensus(610)

Consensus(669)
