# Supplementary material for: Structure-Function Analysis of Diacylglycerol Acyltransferase Sequences from 70 Organisms
Source: Springer Nature journal article supplement (doi:10.1186/1756-0500-4-249), 2011-07-21
Supplement: 13104_2011_1001_MOESM3_ESM.pdf [file 13104_2011_1001_MOESM3_ESM.pdf]

**A**

(288) 288 300 310 320 335

DmDGAT1-*NP\_609813.1*(120) **HRPRD**SLF**WSSSG**TN-F**SG**ILV**WGFLL**CIGGL**R**GL**ENL**LK**YGI**R**I**  
DmDGAT1-*NP\_995724.1*(170) **HRPRD**SLF**WSSSG**TN-F**SG**ILV**WGFLL**CIGGL**R**GL**ENL**LK**YGI**R**I**  
TcDGAT1-*XP\_975142.1*(39) **HKPRD**SL**LWSSNG**ES-F**TG**EV**WAFLL**SIGGL**R**L**ENL**F**IKYGI**R**V**  
BbdGAT1-AAZ22403.1(66) **HR**LQ**DSL**F**SSDSG**SS-Y**R**IL**WCV**VM**L**IL**S**N**AR**L**F**LE**N**L**IKYGI**I**V**  
BtDGAT1-*NP\_777118.2*(66) **HR**LQ**DSL**F**SSDSG**SS-Y**R**IL**WCV**VM**L**IL**S**N**AR**L**F**LE**N**L**IKYGI**I**V**  
OaDGAT1-*NP\_001103634.1*(66) **HR**LQ**DSL**F**SSDSG**SS-Y**R**IL**WCV**VM**L**IL**S**N**AR**L**F**LE**N**L**IKYGI**I**V**  
SsdGAT1-*NP\_999216.1*(66) **HR**LQ**DSL**F**SSDSG**SS-Y**R**IL**WCV**VM**L**IL**S**N**AR**L**F**LE**N**L**IKYGI**I**V**  
CfDGAT1-*XP\_849176.1*(66) **HR**LQ**DSL**F**SSDSG**SS-Y**R**IL**WCV**VM**L**IL**S**N**AR**L**F**LE**N**L**IKYGI**I**V**  
CfDGAT1-*XP\_858062.1*(66) **HR**LQ**DSL**F**SSDSG**SS-Y**R**IL**WCV**VM**L**IL**S**N**AR**L**F**LE**N**L**IKYGI**I**V**  
HsDGAT1-*NP\_036211.2*(69) **HR**LQ**DSL**F**SSDSG**SS-Y**R**IL**WCV**VM**L**IL**S**N**AR**L**F**LE**N**L**IKYGI**I**V**  
MmDGAT1-*XP\_001090134.1*(72) **HR**LQ**DSL**F**SSDSG**SS-Y**R**IL**WCV**VM**L**IL**S**N**AR**L**F**LE**N**L**IKYGI**I**V**  
PtDGAT1-*XP\_520014.2*(69) **HR**LQ**DSL**F**SSDSG**SS-Y**R**IL**WCV**VM**L**VS**G**T**C**R**L**H**H**V**A**A**S**T**G**L**G**  
MmDGAT1-*NP\_034176.1*(78) **HR**LQ**DSL**F**SSDSG**SS-Y**R**IL**WCV**VM**L**IL**S**N**AR**L**F**LE**N**L**IKYGI**I**V**  
RnDGAT1-*NP\_445889.1*(78) **HR**LQ**DSL**F**SSDSG**SS-Y**R**IL**WCV**VM**L**IL**S**N**AR**L**S**LE**N**L**IKYGI**I**V**  
OcdGAT1-*XP\_00272427.1*(85) **HR**LQ**DSL**F**SSDSG**SS-Y**R**IL**WCV**VM**L**IL**S**N**AR**L**F**LE**N**L**IKYGI**I**V**  
MdDGAT1-*XP\_001371565.1*(210) **HR**VQ**ESL**F**SSASG**SS-Y**R**IL**WCV**VM**L**IL**S**N**AR**L**F**LE**N**L**IKYGI**I**V**  
DrDGAT1-*NP\_001002458.1*(77) **HK**LQ**ES**M**L**SS**ASS**SKN-Y**R**IL**WCV**VM**L**V**L**S**N**AR**L**F**LE**N**L**R**IKYGI**I**V**  
DrDGAT1-*NP\_956024.1*(69) **HK**LQ**ES**L**SSASG**SS-Y**R**IL**WCV**VM**L**V**L**S**N**AR**L**V**LE**N**L**IK**YGI**I**V**  
SKDGAT1-*XP\_002736160.1*(46) **HK**H**M**D**L**SS**SG**W**T**N-F**R**GM**L**CV**L**V**L**GL**A**N**R**L**V**LE**N**L**IKYGI**L**I**  
DdDGAT1-*XP\_645633.2*(195) **F**L**R**P**I**L**S**SE**S**NG**SS**-Y**R**F**L**N**L**L**L**L**L**L**I**T**A**S**F**R**V**L**I**L**H**L**L**Y**G**I**R**  
PpDGAT1-EFA85004.1(183) **F**A**L**R**P**I**L**SS**EST**G**A**S-Y**R**F**L**N**M**V**L**L**L**L**I**L**T**S**F**R**V**L**I**L**H**L**T**Y**G**I**R**  
AcDGAT2-EGC41804.1(69) **S**R**P**R**V**CL**S**R**S**ET**SP**S**F**F**R**N**L**M**V**L**V**L**V**M**L**R**L**I**V**E**N**F**M**K**Y**G**V**L**I**  
PbdGAT1-EEH1710.1(62) **S**R**L**T**I**C**L**S**R**E**S**EV**N**P**F**F**R**N**L**M**V**L**V**L**V**M**L**R**L**I**V**E**N**F**M**K**Y**G**V**L**I**  
AoDGAT2-EEQ31683.1(63) **S**E**V**K**P**CL**S**R**S**D**K**SP**S**F**L**F**R**N**L**M**V**L**V**L**V**M**L**R**L**I**V**E**N**F**M**K**Y**G**V**L**I**  
MadGAT2-EFY86774.1(64) **S**K**S**R**P**CL**S**R**S**D**T**Q**SP**F**I**F**R**N**L**M**V**L**V**L**V**M**L**R**L**I**V**E**N**F**M**K**Y**G**V**L**I**  
MadGAT2-EFY97444.1(64) **S**K**S**R**P**CL**S**R**S**D**T**Q**SP**F**I**F**R**N**L**M**V**L**V**L**V**M**L**R**L**I**V**E**N**F**M**K**Y**G**V**L**I**  
TgDGAT1-AAP94209.1(104) **H**G**A**Y**R**A**T**L**H**H**T**K**N**L**N**L**R**G**L**F**L**N**L**F**F**I**L**F**V**I**N**F**R**M**A**D**L**M**K**E**G**L**M**  
CvdGAT1-EFN50697.1(12) **L**F**S**H**P**P**P**L**S**P**P**H**P**P**G**V**I**T**H**V**L**I**A**L**I**N**F**R**L**I**M**I**K**R**L**R**F**  
PpDGAT1-*XP\_001770929.1*(34) **R**V**R**ES**P**L**S**S**D**A**I**F**Q**S**H**A**G**L**F**N**L**C**I**V**L**V**A**V**N**S**R**L**I**E**N**L**M**K**Y**G**L**L**I**  
SmDGAT1-*XP\_002964165.1*(9) **R**V**R**ES**P**L**S**S**D**A**I**F**Q**S**H**A**G**L**F**N**L**C**I**V**L**V**A**V**N**S**R**L**I**E**N**L**M**K**Y**G**L**L**I**  
OsdGAT1-*NP\_001054869.2*(125) **R**K**A**ES**P**L**S**S**D**A**I**F**Q**S**H**A**G**L**F**N**L**C**I**V**L**V**A**V**N**S**R**L**I**E**N**L**M**K**Y**G**L**L**I**  
SbdGAT1-*XP\_002439419.1*(102) **R**K**A**ES**P**L**S**S**D**A**I**F**Q**S**H**A**G**L**F**N**L**C**I**V**L**V**A**V**N**S**R**L**I**E**N**L**M**K**Y**G**L**L**I**  
SbdGAT1-*XP\_002437165.1*(76) **R**V**R**ES**P**L**S**S**D**A**I**F**Q**S**H**A**G**L**L**N**L**C**I**V**L**V**A**V**N**S**R**L**I**E**N**L**M**K**Y**G**L**L**I**  
ZmDGAT1-2-EU039830(80) **R**V**R**ES**P**L**S**S**D**A**I**F**Q**S**H**A**G**L**L**N**L**C**I**V**L**V**A**V**N**S**R**L**I**E**N**L**M**K**Y**G**L**L**I**  
VgDGAT1-ABV21945.1(110) **R**V**R**ES**P**L**S**S**D**A**I**F**Q**S**H**A**G**L**L**N**L**C**I**V**L**V**A**V**N**S**R**L**I**E**N**L**M**K**Y**G**L**L**I**  
EpDGAT1-ACO55635.1(60) **R**V**R**ES**P**L**S**S**D**A**I**F**Q**S**H**A**G**L**F**N**L**C**I**V**L**V**A**V**N**S**R**L**I**E**N**L**M**K**Y**G**L**L**I**  
OeDGAT1-AAS01606.1(119) **R**V**R**ES**P**L**S**S**D**A**I**F**Q**S**H**A**G**L**F**N**L**C**I**V**L**V**A**V**N**S**R**L**I**E**N**L**M**K**Y**G**L**L**I**  
PfdGAT1-AAG23696.1(121) **R**K**N**ES**P**L**S**S**D**A**I**F**Q**S**H**A**G**L**F**N**L**C**I**V**L**V**A**V**N**S**R**L**I**E**N**L**M**K**Y**G**L**L**I**  
NtdGAT1-AAE19345.1(123) **R**V**R**ES**P**L**S**S**D**A**I**F**Q**S**H**A**G**L**F**N**L**C**I**V**L**V**A**V**N**S**R**L**I**E**N**L**M**K**Y**G**L**L**I**  
AtDGAT1-*NP\_179535.1*(115) **R**V**R**ES**P**L**S**S**D**A**I**F**Q**S**H**A**G**L**F**N**L**C**I**V**L**V**A**V**N**S**R**L**I**E**N**L**M**K**Y**G**L**L**I**  
BjDGAT1-AAY40784.1(98) **R**R**T**ES**P**L**S**S**D**A**I**F**Q**S**H**A**G**L**F**N**L**C**I**V**L**V**A**V**N**S**R**L**I**E**N**L**M**K**Y**G**L**L**I**  
BndGAT1-AAD45536.1(98) **R**R**T**ES**P**L**S**S**D**A**I**F**Q**S**H**A**G**L**F**N**L**C**I**V**L**V**A**V**N**S**R**L**I**E**N**L**M**K**Y**G**L**L**I**  
BjDGAT2-AAY40785.1(98) **R**R**T**ES**P**L**S**S**D**A**I**F**Q**S**H**A**G**L**F**N**L**C**I**V**L**V**A**V**N**S**R**L**I**E**N**L**M**K**Y**G**L**L**I**  
TmDGAT1-AAM03340.2(107) **R**V**R**ES**P**L**S**S**D**A**I**F**Q**S**H**A**G**L**F**N**L**C**I**V**L**V**A**V**N**S**R**L**I**E**N**L**M**K**Y**G**L**L**I**  
EadGAT1-AAV31083.1(94) **R**T**I**ES**P**L**S**S**D**A**I**F**Q**S**H**A**G**L**F**N**L**C**I**V**L**V**A**V**N**S**R**L**I**E**N**L**M**K**Y**G**L**L**I**  
GmDGAT1-AAS78662.1(85) **R**K**V**K**E**S**P**L**S**S**D**T**I**F**Q**S**H**A**G**L**F**N**L**C**I**V**L**V**A**V**N**S**R**L**I**E**N**L**M**K**Y**G**L**L**I**  
GmDGAT1-AAE93461.1(91) **R**K**V**K**E**S**P**L**S**S**D**T**I**F**Q**S**H**A**G**L**F**N**L**C**I**V**L**V**A**V**N**S**R**L**I**E**N**L**M**K**Y**G**L**L**I**  
LjDGAT1-BAW51456.1(98) **R**V**R**ES**P**L**S**S**D**N**I**F**R**H-H**A**E**L**F**N**L**C**I**V**L**V**A**V**N**S**R**L**I**E**N**L**M**K**Y**G**L**L**I  
MtdGAT1-ABN09107.1(125) **R**V**R**ES**P**L**S**S**D**G**N**I**F**Q**S**H**A**G**L**F**N**L**C**I**V**L**V**A**V**N**S**R**L**I**E**N**L**M**K**Y**G**L**L**I  
VvdGAT1-*XP\_002279345.1*(102) **R**V**R**ES**P**L**S**S**D**A**I**F**Q**S**H**A**G**L**F**N**L**C**I**V**L**V**A**V**N**S**R**L**I**E**N**L**M**K**Y**G**L**L**I**  
JcdGAT1-AB884383.1(106) **R**A**L**K**E**S**P**L**S**S**D**A**I**F**Q**S**H**A**G**L**F**N**L**C**I**V**L**V**A**V**N**S**R**L**I**E**N**L**M**K**Y**G**L**L**I**  
VfdGAT1-DQ356680.1(111) **R**A**L**K**E**S**P**L**S**S**D**N**I**F**Q**S**H**A**G**L**F**N**L**C**I**V**L**V**A**V**N**S**R**L**I**E**N**L**M**K**Y**G**L**L**I**  
RcdGAT1-*XP\_002514132.1*(111) **R**S**L**K**E**S**P**L**S**S**D**L**I**F**Q**S**H**A**G**L**F**N**L**C**I**V**L**V**A**V**N**S**R**L**I**E**N**L**M**K**Y**G**L**L**I**  
PtDGAT1-*XP\_002308278.1*(37) **R**G**V**R**E**S**P**L**S**S**D**A**I**F**Q**S**H**A**G**L**F**N**L**C**I**V**L**V**A**V**N**S**R**L**I**E**N**L**M**K**Y**G**L**L**I**  
PtDGAT1-*XP\_002330510.1*(78) **S**G**V**R**E**S**P**L**S**S**D**A**I**F**Q**S**H**A**G**L**F**N**L**C**I**V**L**V**A**V**N**S**R**L**I**E**N**L**M**K**Y**G**L**L**I**

Consensus(288) R ESPLSSD F SH GL NLC VVL A N RLIIENLMKYG LI

**B**

(447) 447 462

DmDGAT1-*NP\_609813.1*(259) **F**L**K**L**W**S**V**Q**T**N**M**W**C**R**Q**  
DmDGAT1-*NP\_995724.1*(309) **F**L**K**L**W**S**V**Q**T**N**M**W**C**R**Q**  
TcDGAT1-*XP\_975142.1*(178) **F**L**K**L**W**S**V**Q**V**N**L**W**C**R**N**  
BbdGAT1-AAZ22403.1(202) **F**P**K**L**F**S**R**D**V**N**L**W**C**R**E**  
BtDGAT1-*NP\_777118.2*(202) **F**L**K**L**F**S**R**D**V**N**L**W**C**R**E**  
OaDGAT1-*NP\_001103634.1*(202) **F**L**K**L**F**S**R**D**V**N**L**W**C**R**E**  
SsdGAT1-*NP\_999216.1*(202) **F**L**K**L**F**S**R**D**V**N**L**W**C**R**E**  
CfDGAT1-*XP\_849176.1*(202) **F**L**K**L**F**S**R**D**V**N**L**W**C**R**E**  
CfDGAT1-*XP\_858062.1*(202) **F**L**K**L**F**S**R**D**V**N**L**W**C**R**E**  
HsDGAT1-*NP\_036211.2*(205) **F**L**K**L**F**S**R**D**V**N**W**S**C**R**-**  
MmDGAT1-*XP\_001090134.1*(208) **F**L**K**L**F**S**R**D**V**N**L**W**C**R**-**  
PtDGAT1-*XP\_520014.2*(205) **F**L**K**L**F**S**R**D**V**N**W**S**C**R**-**  
MmDGAT1-*NP\_034176.1*(214) **F**L**K**L**F**S**R**D**V**N**L**W**C**R**Q**  
RnDGAT1-*NP\_445889.1*(214) **F**L**K**L**S**S**R**D**V**N**L**W**C**R**Q**  
OcdGAT1-*XP\_00272427.1*(221) **F**L**K**L**F**S**R**D**V**N**L**W**C**R**Q**  
MdDGAT1-*XP\_001371565.1*(346) **F**L**K**L**F**S**R**Y**Q**V**N**L**W**C**R**  
DrDGAT1-*NP\_001002458.1*(213) **F**L**K**L**F**Y**S**K**D**V**N**K**W**C**R**  
DrDGAT1-*NP\_956024.1*(205) **F**L**K**L**F**S**R**T**D**V**N**K**W**C**R**  
SKDGAT1-*XP\_002736160.1*(184) **F**L**K**L**I**S**V**L**V**N**R**W**C**R**Q**  
DdDGAT1-*XP\_645633.2*(327) **S**M**K**I**S**I**S**Y**A**E**N**S**K**Q**R**K  
PpDGAT1-EFA85004.1(315) **S**M**K**I**S**I**S**Y**A**E**N**K**Q**R**K**  
AcDGAT2-EGC41804.1(226) **W**L**K**L**I**C**S**Y**A**F**T**N**R**L**L**H  
PbdGAT1-EEH1710.1(219) **W**L**K**L**I**C**S**Y**A**F**T**N**R**L**L**H  
AoDGAT2-EEQ31683.1(220) **W**L**K**N**C**S**Y**A**F**T**N**R**L**L**H**  
MadGAT2-EFY86774.1(191) **S**L**K**T**A**S**Y**A**F**T**N**R**L**L**H**  
MadGAT2-EFY97444.1(220) **S**L**K**T**A**S**Y**A**F**T**N**R**L**L**H**  
TgDGAT1-AAP94209.1(239) **L**F**K**L**F**S**F**H**V**C**L**D**A**R**R**  
CvdGAT1-EFN50697.1(141) **W**L**K**L**I**C**S**Y**A**F**T**N**Y**I**R**V  
PpDGAT1-*XP\_001770929.1*(168) **W**M**K**L**I**S**Y**A**H**V**K**M**D**R**E**  
SmDGAT1-*XP\_002964165.1*(141) **W**L**K**L**V**S**Y**A**H**T**N**A**I**R**A**  
OsdGAT1-*NP\_001054869.2*(259) **W**L**K**L**V**S**Y**A**H**T**N**H**I**R**K**  
SbdGAT1-*XP\_002439419.1*(236) **W**L**K**L**V**S**Y**A**H**T**N**H**I**R**K**  
SbdGAT1-*XP\_002437165.1*(210) **W**M**K**L**V**S**Y**A**H**T**N**Y**I**R**A**  
ZmDGAT1-2-EU039830(214) **W**M**K**L**V**S**Y**A**H**T**N**I**R**V  
VgDGAT1-ABV21945.1(244) **W**L**K**L**V**S**F**V**H**T**N**Y**D**M**S**  
EpDGAT1-ACO55635.1(194) **W**L**K**L**V**S**Y**A**H**T**N**Y**D**M**R**A  
OeDGAT1-AAS01606.1(253) **W**L**K**L**V**S**Y**A**H**A**S**H**M**R**A**  
PfdGAT1-AAG23696.1(255) **W**L**K**L**V**S**Y**A**H**T**N**Y**L**R**V**  
NtdGAT1-AAE19345.1(257) **W**M**K**L**V**S**Y**A**H**T**N**H**M**D**R**E  
AtDGAT1-*NP\_179535.1*(249) **W**L**K**L**V**S**Y**A**H**T**N**Y**S**I**R**S  
BjDGAT1-AAY40784.1(232) **W**L**K**L**V**S**Y**A**H**T**N**Y**S**I**R**T  
BndGAT1-AAD45536.1(232) **W**L**K**L**V**S**Y**A**H**T**N**Y**S**I**R**T  
BjDGAT2-AAY40785.1(232) **W**L**K**L**V**S**Y**A**H**T**N**Y**I**R**T**  
TmDGAT1-AAM03340.2(241) **W**L**K**L**V**S**Y**A**H**T**N**Y**S**S**I**R**T**  
EadGAT1-AAV31083.1(262) **W**L**K**L**V**S**Y**A**H**T**N**Y**D**M**R**A  
GmDGAT1-AAS78662.1(219) **W**L**K**L**V**S**Y**A**H**T**N**Y**D**M**R**A  
GmDGAT1-AAE93461.1(225) **W**L**K**L**V**S**Y**A**H**T**N**Y**D**M**R**A  
LjDGAT1-BAW51456.1(230) **W**L**K**L**V**S**Y**A**H**T**N**Y**D**M**R**E  
MtdGAT1-ABN09107.1(259) **W**L**K**L**V**S**Y**A**H**T**N**Y**T**Y**D**M**R**A  
VvdGAT1-*XP\_002279345.1*(236) **W**L**K**L**V**S**Y**A**H**T**N**Y**D**M**R**A  
JcdGAT1-AB884383.1(240) **W**L**K**L**V**S**Y**A**H**T**N**Y**D**M**R**A  
VfdGAT1-DQ356680.1(245) **W**L**K**L**V**S**Y**A**H**T**N**Y**F**M**R**A  
RcdGAT1-*XP\_002514132.1*(245) **W**L**K**L**V**S**Y**A**H**T**N**Y**D**M**R**A  
PtDGAT1-*XP\_002308278.1*(171) **W**L**K**L**V**S**Y**A**H**T**N**Y**S**L**R**A  
PtDGAT1-*XP\_002330510.1*(212) **W**L**K**L**V**S**F**A**H**T**S**S**L**M**R**A

Consensus(447) WLKLVSAHTN D R

**C**

(509) 509 520 530 548

DmDGAT1-*NP\_609813.1*(312) **Y**P**D**N**L**T**Y**K**D**L**L**Y**F**L**C**A**P**L**C**Y**E**L**N**F**R**T**S**R**V**K**R**F**L**L**K**R  
DmDGAT1-*NP\_995724.1*(362) **Y**P**D**N**L**T**Y**K**D**L**L**Y**F**L**C**A**P**L**C**Y**E**L**N**F**R**T**S**R**V**K**R**F**L**L**K**R  
TcDGAT1-*XP\_975142.1*(239) **Y**P**D**N**L**N**L**R**D**L**F**Y**F**L**C**A**P**L**C**Y**E**L**N**F**R**T**E**R**I**K**R**F**L**L**K**R  
BbdGAT1-AAZ22403.1(243) **Y**P**D**N**L**T**Y**R**D**L**Y**Y**F**L**F**A**P**L**C**Y**E**L**N**F**R**S**P**R**I**K**R**F**L**L**R**  
BtDGAT1-*NP\_777118.2*(243) **Y**P**D**N**L**T**Y**R**D**L**Y**Y**F**L**F**A**P**L**C**Y**E**L**N**F**R**S**P**R**I**K**R**F**L**L**R**  
OaDGAT1-*NP\_001103634.1*(243) **Y**P**D**N**L**T**Y**R**D**L**Y**Y**F**L**F**A**P**L**C**Y**E**L**N**F**R**S**P**R**I**K**R**F**L**L**R**  
SsdGAT1-*NP\_999216.1*(243) **Y**P**D**N**L**T**Y**R**D**L**Y**Y**F**L**F**A**P**L**C**Y**E**L**N**F**R**S**P**R**I**K**R**F**L**L**R**  
CfDGAT1-*XP\_849176.1*(252) **Y**P**D**N**L**T**Y**R**D**L**Y**Y**F**L**F**A**P**L**C**Y**E**L**N**F**R**S**P**R**I**K**R**F**L**L**R**  
CfDGAT1-*XP\_858062.1*(233) **S**L**P**S**L**P**P**A**D**L**Y**Y**F**L**F**A**P**L**C**Y**E**L**N**F**R**S**P**R**I**K**R**F**L**L**R**  
HsDGAT1-*NP\_036211.2*(242) **Y**P**D**N**L**T**Y**R**D**L**Y**Y**F**L**F**A**P**L**C**Y**E**L**N**F**R**S**P**R**I**K**R</**
