# Supplementary material for: Structure-Function Analysis of Diacylglycerol Acyltransferase Sequences from 70 Organisms
Source: Springer Nature journal article supplement (doi:10.1186/1756-0500-4-249), 2011-07-21
Supplement: 13104_2011_1001_MOESM4_ESM.pdf [file 13104_2011_1001_MOESM4_ESM.pdf]

A

(580) 580 599  
 DmDGAT1-NP\_609813.1(359) --VNVVMALFQWIIIFSVRN  
 DmDGAT1-NP\_995724.1(409) --VNVVMALFQWIIIFSVRN  
 TcDGAT1-XP\_975142.1(286) --ZQLILCFLQWMIISVKN  
 BbDGAT1-AAZ22403.1(1288) FLIQLQVGLIQQWVFAIQN  
 BtDGAT1-NP\_777118.2(288) FLIQLQVGLIQQWVFAIQN  
 OaDGAT1-NP\_001103634.1(288) FLIQLQVGLIQQWVFAIQN  
 SsDGAT1-NP\_999216.1(288) FLIQLQVGLIQQWVFAIQN  
 CDGAT1-XP\_849176.1(297) FLIQLQVGLIQQWVFAIQN  
 CDGAT1-XP\_858062.1(304) FLIQLQVGLIQQWVFAIQN  
 HsDGAT1-NP\_036211.2(287) FTQLQVGLIQQWVFAIQN  
 MmDGAT1-XP\_001090134.1(290) FTQLQVGLIQQWVFAIQN  
 PtDGAT1-XP\_520014.2(287) FTQLQVGLIQQWVFAIQN  
 MmDGAT1-NP\_034176.1(298) FTQLQVGLIQQWVFAIQN  
 RndGAT1-NP\_445889.1(298) FTQLQVGLIQQWVFAIQN  
 OcDGAT1-XP\_002724427.1(302) FTQLQVGLIQQWVFAIQN  
 MdDGAT1-XP\_001371565.1(430) FTQLQVGLIQQWVFAIQN  
 DrDGAT1-NP\_001002458.1(303) LLQLLVGLIQQWVFAIQN  
 DrDGAT1-NP\_956024.1(296) FLMLQVGLIQQWVFAIQN  
 SKDGAT1-XP\_002736160.1(280) FTQLQVGLIQQWVFAIQN  
 DdDGAT1-XP\_645633.2(404) SLSLILWMLVQLVQVFAIQN  
 PpDGAT1-EFA85004.1(391) FLSALIFWVMEQVFAIQN  
 AcDGAT2-EGC41804.1(305) GLSVFIWLTSAQVFAIQN  
 PbdGAT1-EEH1710.1(298) GLSVFIWLTSAQVFAIQN  
 AodGAT2-EEQ31683.1(299) GLVFFIWIISQVFAIQN  
 MaDGAT2-EFY86774.1(270) CLSAFIWFAQVFAIQN  
 MaDGAT2-EFY97444.1(299) CLSAFIWFAQVFAIQN  
 TgDGAT1-AAFP94209.1(322) ACLANMKIVVDQVFAIQN  
 CvdGAT1-EFN50697.1(222) GGLMLFSLVQVFAIQN  
 PpDGAT1-XP\_001770929.1(247) VFTGLMGFIIQVFAIQN  
 SmDGAT1-XP\_002964165.1(257) VFTGLMGFIIQVFAIQN  
 OsDGAT1-NP\_001054869.2(337) IFTGLMGFIIQVFAIQN  
 SbdGAT1-XP\_002439419.1(314) IFTGLMGFIIQVFAIQN  
 SbdGAT1-XP\_002437165.1(288) VFTGLMGFIIQVFAIQN  
 ZmDGAT1-2-EU039830(292) VFTGLMGFIIQVFAIQN  
 VgDGAT1-ABV21945.1(322) IFTGLMGFIIQVFAIQN  
 EpDGAT1-ACO55635.1(272) IFTGLMGFIIQVFAIQN  
 OeDGAT1-AA501606.1(331) IFTGLMGFIIQVFAIQN  
 PfdGAT1-AAG23696.1(333) IFTGLMGFIIQVFAIQN  
 NtdGAT1-AAF19345.1(331) IFTGLMGFIIQVFAIQN  
 AtDGAT1-NP\_179535.1(320) IFTGLMGFIIQVFAIQN  
 BjdGAT1-AA40784.1(303) IFTGLMGFIIQVFAIQN  
 BndGAT1-AA445536.1(303) IFTGLMGFIIQVFAIQN  
 BjdGAT2-AA40785.1(303) IFTGLMGFIIQVFAIQN  
 TmdGAT1-AAM03340.2(319) VFTGLMGFIIQVFAIQN  
 EadGAT1-AAV31083.1(306) IFTGLMGFIIQVFAIQN  
 GmdGAT1-AA578662.1(297) IFTGLMGFIIQVFAIQN  
 GmdGAT1-BAE93461.1(303) IFTGLMGFIIQVFAIQN  
 LjdGAT1-AAW51456.1(308) IFTGLMGFIIQVFAIQN  
 MtdGAT1-ABN09107.1(338) IFTGLMGFIIQVFAIQN  
 VvdGAT1-XP\_002279345.1(314) IFTGLMGFIIQVFAIQN  
 JcdGAT1-ABB84383.1(318) IFTGLMGFIIQVFAIQN  
 VfdGAT1-DQ356680.1(323) IFTGLMGFIIQVFAIQN  
 RcdGAT1-XP\_002514132.1(322) IFTGLMGFIIQVFAIQN  
 PtDGAT1-XP\_002308278.1(249) IFTGLMGFIIQVFAIQN  
 PtDGAT1-XP\_002330510.1(290) IFTGLMGFIIQVFAIQN

Consensus(580) FTGL FIIEQYI P VQN

B

(625) 625 630 640 650 660 670 680 690 700 710 721  
 DmDGAT1-NP\_609813.1(396) LALPNHLCWLCFFYLMHFSFLNAVGE LLNADRNFYCYLWVWANNIDTFWRTWNPVHRWCVRHLYIFVQWGYSSROASTIVLFSFAVEHLYLVSVP  
 DmDGAT1-NP\_995724.1(446) LALPNHLCWLCFFYLMHFSFLNAVGE LLNADRNFYCYLWVWANNIDTFWRTWNPVHRWCVRHLYIFVQWGYSSROASTIVLFSFAVEHLYLVSVP  
 TcDGAT1-XP\_975142.1(323) LAIIPNHLLWLCFFYILNSWLNLLGELLNADRNFYCYLWVWANNIDTFWRTWNPVHRWCVRHLYIFVQWGYSSROASTIVLFSFAVEHLYLVSVP  
 BbDGAT1-AAZ22403.1(327) LALPNHLLWLCFFYILNSWLNLLGELLNADRNFYCYLWVWANNIDTFWRTWNPVHRWCVRHLYIFVQWGYSSROASTIVLFSFAVEHLYLVSVP  
 BtDGAT1-NP\_777118.2(327) LALPNHLLWLCFFYILNSWLNLLGELLNADRNFYCYLWVWANNIDTFWRTWNPVHRWCVRHLYIFVQWGYSSROASTIVLFSFAVEHLYLVSVP  
 OaDGAT1-NP\_001103634.1(327) LALPNHLLWLCFFYILNSWLNLLGELLNADRNFYCYLWVWANNIDTFWRTWNPVHRWCVRHLYIFVQWGYSSROASTIVLFSFAVEHLYLVSVP  
 SsDGAT1-NP\_999216.1(327) LALPNHLLWLCFFYILNSWLNLLGELLNADRNFYCYLWVWANNIDTFWRTWNPVHRWCVRHLYIFVQWGYSSROASTIVLFSFAVEHLYLVSVP  
 CDGAT1-XP\_849176.1(336) LALPNHLLWLCFFYILNSWLNLLGELLNADRNFYCYLWVWANNIDTFWRTWNPVHRWCVRHLYIFVQWGYSSROASTIVLFSFAVEHLYLVSVP  
 CDGAT1-XP\_858062.1(343) LALPNHLLWLCFFYILNSWLNLLGELLNADRNFYCYLWVWANNIDTFWRTWNPVHRWCVRHLYIFVQWGYSSROASTIVLFSFAVEHLYLVSVP  
 HsDGAT1-NP\_036211.2(326) LALPNHLLWLCFFYILNSWLNLLGELLNADRNFYCYLWVWANNIDTFWRTWNPVHRWCVRHLYIFVQWGYSSROASTIVLFSFAVEHLYLVSVP  
 MmDGAT1-XP\_001090134.1(329) LALPNHLLWLCFFYILNSWLNLLGELLNADRNFYCYLWVWANNIDTFWRTWNPVHRWCVRHLYIFVQWGYSSROASTIVLFSFAVEHLYLVSVP  
 PtDGAT1-XP\_520014.2(326) LALPNHLLWLCFFYILNSWLNLLGELLNADRNFYCYLWVWANNIDTFWRTWNPVHRWCVRHLYIFVQWGYSSROASTIVLFSFAVEHLYLVSVP  
 MmDGAT1-NP\_034176.1(337) LALPNHLLWLCFFYILNSWLNLLGELLNADRNFYCYLWVWANNIDTFWRTWNPVHRWCVRHLYIFVQWGYSSROASTIVLFSFAVEHLYLVSVP  
 RndGAT1-NP\_445889.1(337) LALPNHLLWLCFFYILNSWLNLLGELLNADRNFYCYLWVWANNIDTFWRTWNPVHRWCVRHLYIFVQWGYSSROASTIVLFSFAVEHLYLVSVP  
 OcDGAT1-XP\_002724427.1(341) LALPNHLLWLCFFYILNSWLNLLGELLNADRNFYCYLWVWANNIDTFWRTWNPVHRWCVRHLYIFVQWGYSSROASTIVLFSFAVEHLYLVSVP  
 MdDGAT1-XP\_001371565.1(469) LALPNHLLWLCFFYILNSWLNLLGELLNADRNFYCYLWVWANNIDTFWRTWNPVHRWCVRHLYIFVQWGYSSROASTIVLFSFAVEHLYLVSVP  
 DrDGAT1-NP\_001002458.1(342) LALPNHLLWLCFFYILNSWLNLLGELLNADRNFYCYLWVWANNIDTFWRTWNPVHRWCVRHLYIFVQWGYSSROASTIVLFSFAVEHLYLVSVP  
 DrDGAT1-NP\_956024.1(335) LALPNHLLWLCFFYILNSWLNLLGELLNADRNFYCYLWVWANNIDTFWRTWNPVHRWCVRHLYIFVQWGYSSROASTIVLFSFAVEHLYLVSVP  
 SKDGAT1-XP\_002736160.1(319) LAIIPNHLLWLCFFYILNSWLNLLGELLNADRNFYCYLWVWANNIDTFWRTWNPVHRWCVRHLYIFVQWGYSSROASTIVLFSFAVEHLYLVSVP  
 DdDGAT1-XP\_645633.2(443) LALPNHLLWLCFFYILNSWLNLLGELLNADRNFYCYLWVWANNIDTFWRTWNPVHRWCVRHLYIFVQWGYSSROASTIVLFSFAVEHLYLVSVP  
 PpDGAT1-EFA85004.1(430) LALPNHLLWLCFFYILNSWLNLLGELLNADRNFYCYLWVWANNIDTFWRTWNPVHRWCVRHLYIFVQWGYSSROASTIVLFSFAVEHLYLVSVP  
 AcDGAT2-EGC41804.1(344) LALPNHLLWLCFFYILNSWLNLLGELLNADRNFYCYLWVWANNIDTFWRTWNPVHRWCVRHLYIFVQWGYSSROASTIVLFSFAVEHLYLVSVP  
 PbdGAT1-EEH1710.1(337) LALPNHLLWLCFFYILNSWLNLLGELLNADRNFYCYLWVWANNIDTFWRTWNPVHRWCVRHLYIFVQWGYSSROASTIVLFSFAVEHLYLVSVP  
 AodGAT2-EEQ31683.1(338) LALPNHLLWLCFFYILNSWLNLLGELLNADRNFYCYLWVWANNIDTFWRTWNPVHRWCVRHLYIFVQWGYSSROASTIVLFSFAVEHLYLVSVP  
 MaDGAT2-EFY86774.1(309) LALPNHLLWLCFFYILNSWLNLLGELLNADRNFYCYLWVWANNIDTFWRTWNPVHRWCVRHLYIFVQWGYSSROASTIVLFSFAVEHLYLVSVP  
 MaDGAT2-EFY97444.1(338) LALPNHLLWLCFFYILNSWLNLLGELLNADRNFYCYLWVWANNIDTFWRTWNPVHRWCVRHLYIFVQWGYSSROASTIVLFSFAVEHLYLVSVP  
 TgDGAT1-AAFP94209.1(367) LALPNHLLWLCFFYILNSWLNLLGELLNADRNFYCYLWVWANNIDTFWRTWNPVHRWCVRHLYIFVQWGYSSROASTIVLFSFAVEHLYLVSVP  
 CvdGAT1-EFN50697.1(261) LALPNHLLWLCFFYILNSWLNLLGELLNADRNFYCYLWVWANNIDTFWRTWNPVHRWCVRHLYIFVQWGYSSROASTIVLFSFAVEHLYLVSVP  
 PpDGAT1-XP\_001770929.1(285) LALPNHLLWLCFFYILNSWLNLLGELLNADRNFYCYLWVWANNIDTFWRTWNPVHRWCVRHLYIFVQWGYSSROASTIVLFSFAVEHLYLVSVP  
 SmDGAT1-XP\_002964165.1(257) LALPNHLLWLCFFYILNSWLNLLGELLNADRNFYCYLWVWANNIDTFWRTWNPVHRWCVRHLYIFVQWGYSSROASTIVLFSFAVEHLYLVSVP  
 OsDGAT1-NP\_001054869.2(375) LALPNHLLWLCFFYILNSWLNLLGELLNADRNFYCYLWVWANNIDTFWRTWNPVHRWCVRHLYIFVQWGYSSROASTIVLFSFAVEHLYLVSVP  
 SbdGAT1-XP\_002439419.1(352) LALPNHLLWLCFFYILNSWLNLLGELLNADRNFYCYLWVWANNIDTFWRTWNPVHRWCVRHLYIFVQWGYSSROASTIVLFSFAVEHLYLVSVP  
 SbdGAT1-XP\_002437165.1(326) LALPNHLLWLCFFYILNSWLNLLGELLNADRNFYCYLWVWANNIDTFWRTWNPVHRWCVRHLYIFVQWGYSSROASTIVLFSFAVEHLYLVSVP  
 ZmDGAT1-2-EU039830(330) LALPNHLLWLCFFYILNSWLNLLGELLNADRNFYCYLWVWANNIDTFWRTWNPVHRWCVRHLYIFVQWGYSSROASTIVLFSFAVEHLYLVSVP  
 VgDGAT1-ABV21945.1(360) LALPNHLLWLCFFYILNSWLNLLGELLNADRNFYCYLWVWANNIDTFWRTWNPVHRWCVRHLYIFVQWGYSSROASTIVLFSFAVEHLYLVSVP  
 EpDGAT1-ACO55635.1(310) LALPNHLLWLCFFYILNSWLNLLGELLNADRNFYCYLWVWANNIDTFWRTWNPVHRWCVRHLYIFVQWGYSSROASTIVLFSFAVEHLYLVSVP  
 OeDGAT1-AA501606.1(369) LALPNHLLWLCFFYILNSWLNLLGELLNADRNFYCYLWVWANNIDTFWRTWNPVHRWCVRHLYIFVQWGYSSROASTIVLFSFAVEHLYLVSVP  
 PfdGAT1-AAG23696.1(371) LALPNHLLWLCFFYILNSWLNLLGELLNADRNFYCYLWVWANNIDTFWRTWNPVHRWCVRHLYIFVQWGYSSROASTIVLFSFAVEHLYLVSVP  
 NtdGAT1-AAF19345.1(369) LALPNHLLWLCFFYILNSWLNLLGELLNADRNFYCYLWVWANNIDTFWRTWNPVHRWCVRHLYIFVQWGYSSROASTIVLFSFAVEHLYLVSVP  
 AtDGAT1-NP\_179535.1(358) LALPNHLLWLCFFYILNSWLNLLGELLNADRNFYCYLWVWANNIDTFWRTWNPVHRWCVRHLYIFVQWGYSSROASTIVLFSFAVEHLYLVSVP  
 BjdGAT1-AA40784.1(341) LALPNHLLWLCFFYILNSWLNLLGELLNADRNFYCYLWVWANNIDTFWRTWNPVHRWCVRHLYIFVQWGYSSROASTIVLFSFAVEHLYLVSVP  
 BndGAT1-AA445536.1(341) LALPNHLLWLCFFYILNSWLNLLGELLNADRNFYCYLWVWANNIDTFWRTWNPVHRWCVRHLYIFVQWGYSSROASTIVLFSFAVEHLYLVSVP  
 BjdGAT2-AA40785.1(341) LALPNHLLWLCFFYILNSWLNLLGELLNADRNFYCYLWVWANNIDTFWRTWNPVHRWCVRHLYIFVQWGYSSROASTIVLFSFAVEHLYLVSVP  
 TmdGAT1-AAM03340.2(357) LALPNHLLWLCFFYILNSWLNLLGELLNADRNFYCYLWVWANNIDTFWRTWNPVHRWCVRHLYIFVQWGYSSROASTIVLFSFAVEHLYLVSVP  
 EadGAT1-AAV31083.1(344) LALPNHLLWLCFFYILNSWLNLLGELLNADRNFYCYLWVWANNIDTFWRTWNPVHRWCVRHLYIFVQWGYSSROASTIVLFSFAVEHLYLVSVP  
 GmdGAT1-AA578662.1(335) LALPNHLLWLCFFYILNSWLNLLGELLNADRNFYCYLWVWANNIDTFWRTWNPVHRWCVRHLYIFVQWGYSSROASTIVLFSFAVEHLYLVSVP  
 GmdGAT1-BAE93461.1(341) LALPNHLLWLCFFYILNSWLNLLGELLNADRNFYCYLWVWANNIDTFWRTWNPVHRWCVRHLYIFVQWGYSSROASTIVLFSFAVEHLYLVSVP  
 LjdGAT1-AAW51456.1(346) LALPNHLLWLCFFYILNSWLNLLGELLNADRNFYCYLWVWANNIDTFWRTWNPVHRWCVRHLYIFVQWGYSSROASTIVLFSFAVEHLYLVSVP  
 MtdGAT1-ABN09107.1(376) LALPNHLLWLCFFYILNSWLNLLGELLNADRNFYCYLWVWANNIDTFWRTWNPVHRWCVRHLYIFVQWGYSSROASTIVLFSFAVEHLYLVSVP  
 VvdGAT1-XP\_002279345.1(352) LALPNHLLWLCFFYILNSWLNLLGELLNADRNFYCYLWVWANNIDTFWRTWNPVHRWCVRHLYIFVQWGYSSROASTIVLFSFAVEHLYLVSVP  
 JcdGAT1-ABB84383.1(356) LALPNHLLWLCFFYILNSWLNLLGELLNADRNFYCYLWVWANNIDTFWRTWNPVHRWCVRHLYIFVQWGYSSROASTIVLFSFAVEHLYLVSVP  
 VfdGAT1-DQ356680.1(361) LALPNHLLWLCFFYILNSWLNLLGELLNADRNFYCYLWVWANNIDTFWRTWNPVHRWCVRHLYIFVQWGYSSROASTIVLFSFAVEHLYLVSVP  
 RcdGAT1-XP\_002514132.1(360) LALPNHLLWLCFFYILNSWLNLLGELLNADRNFYCYLWVWANNIDTFWRTWNPVHRWCVRHLYIFVQWGYSSROASTIVLFSFAVEHLYLVSVP  
 PtDGAT1-XP\_002308278.1(287) LALPNHLLWLCFFYILNSWLNLLGELLNADRNFYCYLWVWANNIDTFWRTWNPVHRWCVRHLYIFVQWGYSSROASTIVLFSFAVEHLYLVSVP  
 PtDGAT1-XP\_002330510.1(328) LALPNHLLWLCFFYILNSWLNLLGELLNADRNFYCYLWVWANNIDTFWRTWNPVHRWCVRHLYIFVQWGYSSROASTIVLFSFAVEHLYLVSVP

Consensus(625) LSPVNLVWLC FY FHLLWLNLAELL RGDREFT LWNNA V YWR WNMPVHKWM RH Y P LR G K A VFL SA FHE V VP
