# Supplementary material for: Structure-Function Analysis of Diacylglycerol Acyltransferase Sequences from 70 Organisms
Source: Springer Nature journal article supplement (doi:10.1186/1756-0500-4-249), 2011-07-21
Supplement: 13104_2011_1001_MOESM5_ESM.pdf [file 13104_2011_1001_MOESM5_ESM.pdf]

A

B

|                             | (747)            | 747 | 761 |                             | (777)                                    | 777 | 790 | 801 |
|-----------------------------|------------------|-----|-----|-----------------------------|------------------------------------------|-----|-----|-----|
| DmDGAT1-NP_609813.1(499)    | WAFMGMGQIPLSAI   |     |     | DmDGAT1-NP_609813.1(525)    | MGNIVWAS-ILGQFLCIMA <sup>Y</sup> YHD     |     |     |     |
| DmDGAT1-NP_995724.1(529)    | WAFMGMGQIPLSAI   |     |     | DmDGAT1-NP_995724.1(575)    | MGNIVWAS-ILGQFLCIMA <sup>Y</sup> YHD     |     |     |     |
| TcDGAT1-XP_975142.1(456)    | WAFMGMGQIPLSINSI |     |     | TcDGAT1-XP_975142.1(452)    | MGNIVWAS-LLIGQFLCIMM <sup>Y</sup> YHD    |     |     |     |
| BbDGAT1-AAZ22403.1(430)     | WAFMGMGQIPLAWI   |     |     | BbDGAT1-AAZ22403.1(453)     | YGNAAVWLS-LLIGQFVAVLM <sup>V</sup> VHD   |     |     |     |
| BtDGAT1-NP_777118.2(430)    | WAFMGMGQIPLAWI   |     |     | BtDGAT1-NP_777118.2(453)    | YGNAAVWLS-LLIGQFVAVLM <sup>V</sup> VHD   |     |     |     |
| OaDGAT1-NP_001103634.1(430) | WAFMGMGQIPLAWI   |     |     | OaDGAT1-NP_001103634.1(453) | YGNAAVWLS-LLIGQFVAVLM <sup>V</sup> VHD   |     |     |     |
| SsDGAT1-NP_999216.1(430)    | WAFMGMGQIPLAWI   |     |     | SsDGAT1-NP_999216.1(453)    | YGNAAVWLS-LLIGQFVAVLM <sup>V</sup> VHD   |     |     |     |
| CFDGAT1-XP_849176.1(439)    | WAFMGMGQIPLAWI   |     |     | CFDGAT1-XP_849176.1(462)    | YGNAAVWLT-LLIGQFVAVLM <sup>V</sup> VHD   |     |     |     |
| CFDGAT1-XP_858062.1(446)    | WAFMGMGQIPLAWI   |     |     | CFDGAT1-XP_858062.1(469)    | YGNAAVWLT-LLIGQFVAVLM <sup>V</sup> VHD   |     |     |     |
| HsDGAT1-NP_036211.2(429)    | WAFMGMGQIPLAWF   |     |     | HsDGAT1-NP_036211.2(452)    | YGNAAVWLS-LLIGQFVAVLM <sup>V</sup> VHD   |     |     |     |
| MmDGAT1-XP_001090134.1(432) | WAFMGMGQIPLAWF   |     |     | MmDGAT1-XP_001090134.1(455) | YGNAAVWLT-LLIGQFVAVLM <sup>V</sup> VHD   |     |     |     |
| PtDGAT1-XP_520014.2(429)    | WAFMGMGQIPLAWF   |     |     | PtDGAT1-XP_520014.2(452)    | YGNAAVWLS-LLIGQFVAVLM <sup>V</sup> VHD   |     |     |     |
| MmDGAT1-NP_034176.1(440)    | WAFMGMGQIPLAWF   |     |     | MmDGAT1-NP_034176.1(463)    | YGNAAVWLT-LLIGQFVAVLM <sup>V</sup> VHD   |     |     |     |
| RnDGAT1-NP_445889.1(440)    | WAFMGMGQIPLAWI   |     |     | RnDGAT1-NP_445889.1(463)    | YGNAAVWLT-LLIGQFVAVLM <sup>V</sup> VHD   |     |     |     |
| OcDGAT1-XP_002724427.1(444) | WAFMGMGQIPLAWI   |     |     | OcDGAT1-XP_002724427.1(467) | YGNAAVWLT-LLIGQFVAVLM <sup>V</sup> VHD   |     |     |     |
| MdDGAT1-XP_001371565.1(572) | WAFMGMGQIPLAWI   |     |     | MdDGAT1-XP_001371565.1(595) | YGNAAVWLS-LLIGQFVAVLM <sup>V</sup> VHD   |     |     |     |
| DrDGAT1-NP_001002458.1(445) | WAFMGMGQIPLAWL   |     |     | DrDGAT1-NP_001002458.1(468) | YGNAAVWLS-LLIGQFVAVLM <sup>V</sup> VHD   |     |     |     |
| DrDGAT1-NP_956024.1(438)    | WAFMGMGQIPLAWL   |     |     | DrDGAT1-NP_956024.1(461)    | YGNAAVWMS-LLIGQFVAVLM <sup>V</sup> VHD   |     |     |     |
| SKDGAT1-XP_002736160.1(422) | WAFMGMGQIPLALV   |     |     | SKDGAT1-XP_002736160.1(447) | YGNMIFWMS-VLGGQFVAIMM <sup>V</sup> VHD   |     |     |     |
| DdDGAT1-XP_645633.2(546)    | WAFMGMGQIPLAL    |     |     | DdDGAT1-XP_645633.2(570)    | YGNMIFWIS-IVLGGQFLVLL <sup>Y</sup> YRN   |     |     |     |
| PpDGAT1-EFA85004.1(533)     | WAFMGMGQIPLAL    |     |     | PpDGAT1-EFA85004.1(557)     | YGNMIFWFS-IVLGGQFLVLL <sup>Y</sup> YRN   |     |     |     |
| AcDGAT2-EGC41804.1(447)     | WAFMGMGQIPLIAV   |     |     | AcDGAT2-EGC41804.1(476)     | IGNCVFWVSFCVGGQFLGALL <sup>Y</sup> FFA   |     |     |     |
| PbDGAT1-EEH17170.1(440)     | WAFMGMGQIPLIAA   |     |     | PbDGAT1-EEH17170.1(469)     | IGNCVFWVSFCVGGQFLAALL <sup>Y</sup> FFA   |     |     |     |
| AoDGAT2-EFQ31683.1(441)     | WAFMGMGQIPLIAA   |     |     | AoDGAT2-EFQ31683.1(471)     | IGNSVFWVSFCVGGQFLGALL <sup>Y</sup> FFA   |     |     |     |
| MaDGAT2-EFY86774.1(431)     | WAFMGMGQIPLIAI   |     |     | MaDGAT2-EFY86774.1(460)     | MGNVIFWVSFTLGGQFPAALM <sup>Y</sup> FYA   |     |     |     |
| MaDGAT2-EFY97444.1(460)     | WAFMGMGQIPLIAI   |     |     | MaDGAT2-EFY97444.1(490)     | MGNVIFWVSFTLGGQFPAALM <sup>Y</sup> FYA   |     |     |     |
| TgDGAT1-AAP94209.1(471)     | WAFMGMGQIPLIYI   |     |     | TgDGAT1-AAP94209.1(497)     | VGNMIFWFFSFCFVGGQFLGILL <sup>Y</sup> WYL |     |     |     |
| CvDGAT1-EFN50697.1(364)     | WAFMGMGQIPLIYI   |     |     | CvDGAT1-EFN50697.1(391)     | VGNMIFWVSFCFVGGQFLAMILL <sup>Y</sup> YHD |     |     |     |
| PpDGAT1-XP_001770929.1(388) | WAFMGMGQIPLIYI   |     |     | PpDGAT1-XP_001770929.1(415) | VGNMIFWFFFCVGGQFLMLLY <sup>Y</sup> YHD   |     |     |     |
| SmDGAT1-XP_002964165.1(360) | WAFMGMGQIPLIYI   |     |     | SmDGAT1-XP_002964165.1(387) | VGNMIFWFFFCVGGQFLMLLY <sup>Y</sup> YHD   |     |     |     |
| OsDGAT1-NP_001054869.2(478) | WAFMGMGQIPLIYI   |     |     | OsDGAT1-NP_001054869.2(505) | VGNMIFWFFFCVGGQFLMLLY <sup>Y</sup> YHD   |     |     |     |
| SbDGAT1-XP_002439419.1(455) | WAFMGMGQIPLIYI   |     |     | SbDGAT1-XP_002439419.1(482) | VGNMIFWFFFCVGGQFLMLLY <sup>Y</sup> YHD   |     |     |     |
| SbDGAT1-XP_002437165.1(429) | WAFMGMGQIPLIYI   |     |     | SbDGAT1-XP_002437165.1(456) | VGNMIFWFFFCVGGQFLMLLY <sup>Y</sup> YHD   |     |     |     |
| ZmDGAT1-2-EU039830(433)     | WAFMGMGQIPLIYI   |     |     | ZmDGAT1-2-EU039830(460)     | VGNMIFWFFFCVGGQFLMLLY <sup>Y</sup> YHD   |     |     |     |
| VgDGAT1-ABV21945.1(463)     | WAFMGMGQIPLIYI   |     |     | VgDGAT1-ABV21945.1(490)     | VGNMIFWFFFCVGGQFLMLLY <sup>Y</sup> YHD   |     |     |     |
| EpDGAT1-ACO55635.1(413)     | WAFMGMGQIPLIYI   |     |     | EpDGAT1-ACO55635.1(440)     | VGNMIFWFFFCVGGQFLMLLY <sup>Y</sup> YHD   |     |     |     |
| OeDGAT1-AAS01606.1(472)     | WAFMGMGQIPLIYI   |     |     | OeDGAT1-AAS01606.1(499)     | VGNMIFWFFFCVGGQFLMLLY <sup>Y</sup> YHD   |     |     |     |
| PFDGAT1-AAAG23696.1(474)    | WAFMGMGQIPLIYI   |     |     | PFDGAT1-AAAG23696.1(501)    | VGNMIFWFFFCVGGQFLMLLY <sup>Y</sup> YHD   |     |     |     |
| NtDGAT1-AAF19345.1(472)     | WAFMGMGQIPLIYI   |     |     | NtDGAT1-AAF19345.1(499)     | VGNMIFWFFFCVGGQFLMLLY <sup>Y</sup> YHD   |     |     |     |
| AtDGAT1-NP_179535.1(461)    | WAFMGMGQIPLIYI   |     |     | AtDGAT1-NP_179535.1(487)    | VGNMIFWFFFCVGGQFLMLLY <sup>Y</sup> YHD   |     |     |     |
| BJDGAT1-AAY40784.1(444)     | WAFMGMGQIPLIYI   |     |     | BJDGAT1-AAY40784.1(470)     | VGNMIFWFFFCVGGQFLMLLY <sup>Y</sup> YHD   |     |     |     |
| BnDGAT1-AAD45536.1(444)     | WAFMGMGQIPLIYI   |     |     | BnDGAT1-AAD45536.1(470)     | VGNMIFWFFFCVGGQFLMLLY <sup>Y</sup> YHD   |     |     |     |
| BJDGAT2-AAY40785.1(444)     | WAFMGMGQIPLIYI   |     |     | BJDGAT2-AAY40785.1(470)     | VGNMIFWFFFCVGGQFLMLLY <sup>Y</sup> YHD   |     |     |     |
| TmDGAT1-AAM03340.2(460)     | WAFMGMGQIPLIYI   |     |     | TmDGAT1-AAM03340.2(487)     | VGNMIFWFFFCVGGQFLMLLY <sup>Y</sup> YHD   |     |     |     |
| EaDGAT1-AAV31083.1(447)     | WAFMGMGQIPLIYI   |     |     | EaDGAT1-AAV31083.1(474)     | VGNMIFWFFFCVGGQFLMLLY <sup>Y</sup> YHD   |     |     |     |
| GmDGAT1-AAS78662.1(438)     | WAFMGMGQIPLIYI   |     |     | GmDGAT1-AAS78662.1(465)     | VGNMIFWFFFCVGGQFLMLLY <sup>Y</sup> YHD   |     |     |     |
| GmDGAT1-BAE93461.1(444)     | WAFMGMGQIPLIYI   |     |     | GmDGAT1-BAE93461.1(471)     | VGNMIFWFFFCVGGQFLMLLY <sup>Y</sup> YHD   |     |     |     |
| LjDGAT1-AAW51456.1(449)     | WAFMGMGQIPLIYI   |     |     | LjDGAT1-AAW51456.1(476)     | VGNMIFWFFFCVGGQFLMLLY <sup>Y</sup> YHD   |     |     |     |
| MtDGAT1-ABN09107.1(479)     | WAFMGMGQIPLIYI   |     |     | MtDGAT1-ABN09107.1(506)     | VGNMIFWFFFCVGGQFLMLLY <sup>Y</sup> YHD   |     |     |     |
| VvDGAT1-XP_002279345.1(455) | WAFMGMGQIPLIYI   |     |     | VvDGAT1-XP_002279345.1(482) | VGNMIFWFFFCVGGQFLMLLY <sup>Y</sup> YHD   |     |     |     |
| JcDGAT1-ABBB4383.1(459)     | WAFMGMGQIPLIYI   |     |     | JcDGAT1-ABBB4383.1(486)     | VGNMIFWFFFCVGGQFLMLLY <sup>Y</sup> YHD   |     |     |     |
| VFDGAT1-DQ356680.1(464)     | WAFMGMGQIPLIYI   |     |     | VFDGAT1-DQ356680.1(491)     | VGNMIFWFFFCVGGQFLMLLY <sup>Y</sup> YHD   |     |     |     |
| RcDGAT1-XP_002514132.1(463) | WAFMGMGQIPLIYI   |     |     | RcDGAT1-XP_002514132.1(490) | VGNMIFWFFFCVGGQFLMLLY <sup>Y</sup> YHD   |     |     |     |
| PTDGAT1-XP_002308278.1(390) | WAFMGMGQIPLIYI   |     |     | PTDGAT1-XP_002308278.1(417) | VGNMIFWFFFCVGGQFLMLLY <sup>Y</sup> YHD   |     |     |     |
| PtDGAT1-XP_002330510.1(431) | WAFMGMGQIPLIYI   |     |     | PtDGAT1-XP_002330510.1(458) | VGNMIFWFFFCVGGQFLMLLY <sup>Y</sup> YHD   |     |     |     |

Consensus(747)

WAFMGMGQIPLI

Consensus(777)

VGNMIFW F I GGQFLMLLYYHD
