# Supplementary material for: Structure-Function Analysis of Diacylglycerol Acyltransferase Sequences from 70 Organisms
Source: Springer Nature journal article supplement (doi:10.1186/1756-0500-4-249), 2011-07-21
Supplement: 13104_2011_1001_MOESM6_ESM.pdf [file 13104_2011_1001_MOESM6_ESM.pdf]

A

(233) 233 248

AcDGAT2-XP\_003225477.1(147) RNYIFGYPHFGIMGLG

BtDGAT2-DA021853.1(127) RNYIFGYPHFGIMGLG

MmDGAT2-NP\_080660.1(154) RNYIFGYPHFGIMGLG

RnDGAT2-NP\_001012345.1(154) RNYIFGYPHFGIMGLG

HsDGAT2-AAQ88896.1(154) RNYIFGYPHFGIMGLG

PaDGAT2-XP\_002822304.1(154) RNYIFGYPHFGIMGLG

XtDGAT2-NP\_989372.1(127) RNYIFGYPHFGIMGLG

DrDGAT2-NP\_001025367.1(127) RNYIFGYPHFGIMGLG

IpDGAT2-NP\_001188005.1(127) RNYIFGYPHFGIMGLG

BtDGAT2-XP\_875499.3(172) RNYVLLSPHFGIMGFG

HsDGAT2-NP\_835470.1(107) RNYVLLSPHFGIMGCTG

PtDGAT2-XP\_527842.2(107) RNYVLLSPHFGIMGCTG

DdDGAT2-XP\_635762.1(98) RNYVLLSPHFGIMGCTG

PpDGAT2-EFA83646.1(98) RNYVLLSPHFGIMGCTG

NvDGAT2-XP\_001630435.1(104) RNYVLLSPHFGIMGCTG

NvDGAT2-XP\_001633322.1(105) RNYVLLSPHFGIMGCTG

NvDGAT2-XP\_001635548.1(80) RNYVLLSPHFGIMGCTG

TgDGAT2-XP\_002187643.1(102) QNYLVGPHFGIMGLG

MdDGAT2-XP\_001365685.1(102) HNYVLLSPHFGIMGCTG

CIDGAT2-XP\_002120879.1(102) RNYVLLSPHFGIMGCTG

CeDGAT2-NP\_505413.1(116) HNYVLLSPHFGIMGCTG

CeDGAT2-NP\_872180.1(106) HNYVLLSPHFGIMGCTG

TcDGAT2-XP\_975146.1(107) RNYVLLSPHFGIMGCTG

AgDGAT2-NP\_983542.1(229) RNYVLLSPHFGIMGCTG

ScDGAT2-NP\_014888.1(186) RNYVLLSPHFGIMGCTG

SpDGAT2-XP\_001713160.1(112) RNYVLLSPHFGIMGCTG

CrDGAT2-XP\_001694904.1(108) RNYVLLSPHFGIMGCTG

CrDGAT2-XP\_001693189.1(101) RNYVLLSPHFGIMGCTG

OtDGAT2-XP\_003083539.1(94) RNYVLLSPHFGIMGCTG

PpDGAT2-XP\_001758758.1(99) RNYVLLSPHFGIMGCTG

PpDGAT2-XP\_001777726.1(95) RNYVLLSPHFGIMGCTG

SmDGAT2-XP\_002972054.1(126) RNYVLLSPHFGIMGCTG

PsDGAT2-ABK26256.1(114) RNYVLLSPHFGIMGCTG

SpDGAT2-AAQ89590.1(108) RNYVLLSPHFGIMGCTG

RcDGAT2-XP\_002528531.1(126) RNYVLLSPHFGIMGCTG

VgDGAT2-ACV40232.1(122) RNYVLLSPHFGIMGCTG

VfDGAT2-DG356682(110) RNYVLLSPHFGIMGCTG

EoDGAT2-ACO35365.1(113) RNYVLLSPHFGIMGCTG

HvDGAT2-BAJ85730.1(119) RNYVLLSPHFGIMGCTG

OsDGAT2-NP\_001057530(126) RNYVLLSPHFGIMGCTG

OsDGAT2-NP\_001047917(124) RNYVLLSPHFGIMGCTG

SbDGAT2-XP\_002452652.1(120) RNYVLLSPHFGIMGCTG

ZmDGAT2-NP\_001150174.1(119) RNYVLLSPHFGIMGCTG

AtDGAT2-NP\_566952(101) RNYVLLSPHFGIMGCTG

BnDGAT2a-ACO90187(103) RNYVLLSPHFGIMGCTG

BnDGAT2b-ACO90188(103) RNYVLLSPHFGIMGCTG

VvDGAT2-XP\_002263626(123) RNYVLLSPHFGIMGCTG

EaDGAT2-ADF57328.1(117) RNYVLLSPHFGIMGCTG

GmDGAT2-ACU20344.1(103) RNYVLLSPHFGIMGCTG

MtDGAT2-ACJ84867.1(107) RNYVLLSPHFGIMGCTG

HaDGAT2-ABU50328.1(122) RNYVLLSPHFGIMGCTG

OeDGAT2-ADG22608.1(121) RNYVLLSPHFGIMGCTG

UrDGAT2A-AAK84179.1(119) RNYVLLSPHFGIMGCTG

UrDGAT2B-AAK84180.1(112) RNYVLLSPHFGIMGCTG

Consensus(233) R YVFGYHPHFGIMGLG

B

(272) 272 280 290 300 311

AcDGAT2-XP\_003225477.1(179) GGRIPYLATLGNFRNPEFLRDYLSGGGCPVNRDITIDYLL

BtDGAT2-DA021853.1(159) GGRIPYLATLGNFRNPEFLREYLSGGGCPVNRDITIDYLL

MmDGAT2-NP\_080660.1(186) GGRIPYLATLGNFRNPEFLREYLSGGGCPVNRDITIDYLL

RnDGAT2-NP\_001012345.1(186) GGRIPYLATLGNFRNPEFLREYLSGGGCPVNRDITIDYLL

HsDGAT2-AAQ88896.1(186) GGRIPYLATLGNFRNPEFLREYLSGGGCPVNRDITIDYLL

PaDGAT2-XP\_002822304.1(186) GGRIPYLATLGNFRNPEFLREYLSGGGCPVNRDITIDYLL

XtDGAT2-NP\_989372.1(159) GGRIPYLATLGNFRNPEFLREYLSGGGCPVNRDITIDYLL

DrDGAT2-NP\_001025367.1(159) GGRIPYLATLGNFRNPEFLREYLSGGGCPVNRDITIDYLL

IpDGAT2-NP\_001188005.1(159) GGRIPYLATLGNFRNPEFLREYLSGGGCPVNRDITIDYLL

BtDGAT2-XP\_875499.3(204) GGRIPYLAVNCLLYPFCREYIMSCGTCVNRQSLDYVL

HsDGAT2-NP\_835470.1(139) GGRIPWLAVLAGLYPFCREYIMSCGTCVNRQSLDFIL

PtDGAT2-XP\_527842.2(139) GGRIPWLAVLAGLYPFCREYIMSCGTCVNRQSLDFIL

DdDGAT2-XP\_635762.1(130) GGRIPWLAVLAGLYPFCREYIMSCGTCVNRQSLDFIL

PpDGAT2-EFA83646.1(130) GGRIPWLAVLAGLYPFCREYIMSCGTCVNRQSLDFIL

NvDGAT2-XP\_001630435.1(136) GGRIPWLAVLAGLYPFCREYIMSCGTCVNRQSLDFIL

NvDGAT2-XP\_001633322.1(137) GGRIPWLAVLAGLYPFCREYIMSCGTCVNRQSLDFIL

NvDGAT2-XP\_001635548.1(112) GGRIPWLAVLAGLYPFCREYIMSCGTCVNRQSLDFIL

TgDGAT2-XP\_002187643.1(134) GGRIPWLAVLAGLYPFCREYIMSCGTCVNRQSLDFIL

MdDGAT2-XP\_001365685.1(134) GGRIPWLAVLAGLYPFCREYIMSCGTCVNRQSLDFIL

CIDGAT2-XP\_002120879.1(134) GGRIPWLAVLAGLYPFCREYIMSCGTCVNRQSLDFIL

CeDGAT2-NP\_505413.1(148) GGRIPWLAVLAGLYPFCREYIMSCGTCVNRQSLDFIL

CeDGAT2-NP\_872180.1(138) GGRIPWLAVLAGLYPFCREYIMSCGTCVNRQSLDFIL

TcDGAT2-XP\_975146.1(139) GGRIPWLAVLAGLYPFCREYIMSCGTCVNRQSLDFIL

AgDGAT2-NP\_983542.1(261) GGRIPWLAVLAGLYPFCREYIMSCGTCVNRQSLDFIL

ScDGAT2-NP\_014888.1(218) GGRIPWLAVLAGLYPFCREYIMSCGTCVNRQSLDFIL

SpDGAT2-XP\_001713160.1(144) GGRIPWLAVLAGLYPFCREYIMSCGTCVNRQSLDFIL

CrDGAT2-XP\_001694904.1(136) GGRIPWLAVLAGLYPFCREYIMSCGTCVNRQSLDFIL

CrDGAT2-XP\_001693189.1(132) GGRIPWLAVLAGLYPFCREYIMSCGTCVNRQSLDFIL

OtDGAT2-XP\_003083539.1(133) GGRIPWLAVLAGLYPFCREYIMSCGTCVNRQSLDFIL

PpDGAT2-XP\_001758758.1(126) GGRIPWLAVLAGLYPFCREYIMSCGTCVNRQSLDFIL

PpDGAT2-XP\_001777726.1(122) GGRIPWLAVLAGLYPFCREYIMSCGTCVNRQSLDFIL

SmDGAT2-XP\_002972054.1(153) GGRIPWLAVLAGLYPFCREYIMSCGTCVNRQSLDFIL

PsDGAT2-ABK26256.1(141) GGRIPWLAVLAGLYPFCREYIMSCGTCVNRQSLDFIL

SpDGAT2-AAQ89590.1(135) GGRIPWLAVLAGLYPFCREYIMSCGTCVNRQSLDFIL

RcDGAT2-XP\_002528531.1(153) GGRIPWLAVLAGLYPFCREYIMSCGTCVNRQSLDFIL

VgDGAT2-ACV40232.1(149) GGRIPWLAVLAGLYPFCREYIMSCGTCVNRQSLDFIL

VfDGAT2-DG356682(135) GGRIPWLAVLAGLYPFCREYIMSCGTCVNRQSLDFIL

EoDGAT2-ACO35365.1(140) GGRIPWLAVLAGLYPFCREYIMSCGTCVNRQSLDFIL

HvDGAT2-BAJ85730.1(146) GGRIPWLAVLAGLYPFCREYIMSCGTCVNRQSLDFIL

OsDGAT2-NP\_001057530(153) GGRIPWLAVLAGLYPFCREYIMSCGTCVNRQSLDFIL

OsDGAT2-NP\_001047917(151) GGRIPWLAVLAGLYPFCREYIMSCGTCVNRQSLDFIL

SbDGAT2-XP\_002452652.1(147) GGRIPWLAVLAGLYPFCREYIMSCGTCVNRQSLDFIL

ZmDGAT2-NP\_001150174.1(146) GGRIPWLAVLAGLYPFCREYIMSCGTCVNRQSLDFIL

AtDGAT2-NP\_566952(128) GGRIPWLAVLAGLYPFCREYIMSCGTCVNRQSLDFIL

BnDGAT2a-ACO90187(130) GGRIPWLAVLAGLYPFCREYIMSCGTCVNRQSLDFIL

BnDGAT2b-ACO90188(130) GGRIPWLAVLAGLYPFCREYIMSCGTCVNRQSLDFIL

VvDGAT2-XP\_002263626(150) GGRIPWLAVLAGLYPFCREYIMSCGTCVNRQSLDFIL

EaDGAT2-ADF57328.1(144) GGRIPWLAVLAGLYPFCREYIMSCGTCVNRQSLDFIL

GmDGAT2-ACU20344.1(130) GGRIPWLAVLAGLYPFCREYIMSCGTCVNRQSLDFIL

MtDGAT2-ACJ84867.1(134) GGRIPWLAVLAGLYPFCREYIMSCGTCVNRQSLDFIL

HaDGAT2-ABU50328.1(149) GGRIPWLAVLAGLYPFCREYIMSCGTCVNRQSLDFIL

OeDGAT2-ADG22608.1(148) GGRIPWLAVLAGLYPFCREYIMSCGTCVNRQSLDFIL

UrDGAT2A-AAK84179.1(151) GGRIPWLAVLAGLYPFCREYIMSCGTCVNRQSLDFIL

UrDGAT2B-AAK84180.1(144) GGRIPWLAVLAGLYPFCREYIMSCGTCVNRQSLDFIL

Consensus(272) P KI LL LSAVF IFFLRDI M LGL PVSRRS LL

C

(317) 317 336

AcDGAT2-XP\_003225477.1(224) GNAIVIVVGGAAESLNCTPG

BtDGAT2-DA021853.1(204) GNAIIVVGGAAESLNCTPG

MmDGAT2-NP\_080660.1(231) GNAIIVVGGAAESLNCTPG

RnDGAT2-NP\_001012345.1(231) GNAIIVVGGAAESLNCTPG

HsDGAT2-AAQ88896.1(231) GNAIIVVGGAAESLNCTPG

PaDGAT2-XP\_002822304.1(231) GNAIIVVGGAAESLNCTPG

XtDGAT2-NP\_989372.1(204) GNAIIVVGGAAESLNCTPG

DrDGAT2-NP\_001025367.1(204) GNAIIVVGGAAESLNCTPG

IpDGAT2-NP\_001188005.1(204) GNAIIVVGGAAESLNCTPG

BtDGAT2-XP\_875499.3(249) GRAVIVVGGAAEALHTVPG

HsDGAT2-NP\_835470.1(184) GRAVIVVGGAAEALHTVPG

PtDGAT2-XP\_527842.2(184) GRAVIVVGGAAEALHTVPG

DdDGAT2-XP\_635762.1(174) GRAVIVVGGAAEALHTVPG

PpDGAT2-EFA83646.1(174) GRAVIVVGGAAEALHTVPG

NvDGAT2-XP\_001630435.1(181) GNSIVIVVGGAAEALHTVPG

NvDGAT2-XP\_001633322.1(182) GNSIVIVVGGAAEALHTVPG

NvDGAT2-XP\_001635548.1(157) GNSIVIVVGGAAEALHTVPG

TgDGAT2-XP\_002187643.1(179) GNSIVIVVGGAAEALHTVPG

MdDGAT2-XP\_001365685.1(179) GNSIVIVVGGAAEALHTVPG

CIDGAT2-XP\_002120879.1(179) GNSIVIVVGGAAEALHTVPG

CeDGAT2-NP\_505413.1(193) GNSIVIVVGGAAEALHTVPG

CeDGAT2-NP\_872180.1(183) GNSIVIVVGGAAEALHTVPG

TcDGAT2-XP\_975146.1(184) GNSIVIVVGGAAEALHTVPG

AgDGAT2-NP\_983542.1(305) GNSIVIVVGGAAEALHTVPG

ScDGAT2-NP\_014888.1(262) GNSIVIVVGGAAEALHTVPG

SpDGAT2-XP\_001713160.1(188) GNSIVIVVGGAAEALHTVPG

CrDGAT2-XP\_001694904.1(178) GNSIVIVVGGAAEALHTVPG

CrDGAT2-XP\_001693189.1(175) GNSIVIVVGGAAEALHTVPG

OtDGAT2-XP\_003083539.1(175) GNSIVIVVGGAAEALHTVPG

PpDGAT2-XP\_001758758.1(168) GNSIVIVVGGAAEALHTVPG

PpDGAT2-XP\_001777726.1(164) GNSIVIVVGGAAEALHTVPG

SmDGAT2-XP\_002972054.1(195) GNSIVIVVGGAAEALHTVPG

PsDGAT2-ABK26256.1(183) GNSIVIVVGGAAEALHTVPG

SpDGAT2-AAQ89590.1(177) GNSIVIVVGGAAEALHTVPG

RcDGAT2-XP\_002528531.1(195) GNSIVIVVGGAAEALHTVPG

VgDGAT2-ACV40232.1(191) GNSIVIVVGGAAEALHTVPG

VfDGAT2-DG356682(177) GNSIVIVVGGAAEALHTVPG

EoDGAT2-ACO35365.1(182) GNSIVIVVGGAAEALHTVPG

HvDGAT2-BAJ85730.1(188) GNSIVIVVGGAAEALHTVPG

OsDGAT2-NP\_001057530(195) GNSIVIVVGGAAEALHTVPG

OsDGAT2-NP\_001047917(193) GNSIVIVVGGAAEALHTVPG

SbDGAT2-XP\_002452652.1(189) GNSIVIVVGGAAEALHTVPG

ZmDGAT2-NP\_001150174.1(188) GNSIVIVVGGAAEALHTVPG

AtDGAT2-NP\_566952(170) GNSIVIVVGGAAEALHTVPG

BnDGAT2a-ACO90187(172) GNSIVIVVGGAAEALHTVPG

BnDGAT2b-ACO90188(172) GNSIVIVVGGAAEALHTVPG

VvDGAT2-XP\_002263626(192) GNSIVIVVGGAAEALHTVPG

EaDGAT2-ADF57328.1(186) GNSIVIVVGGAAEALHTVPG

GmDGAT2-ACU20344.1(172) GNSIVIVVGGAAEALHTVPG

MtDGAT2-ACJ84867.1(176) GNSIVIVVGGAAEALHTVPG

HaDGAT2-ABU50328.1(191) GNSIVIVVGGAAEALHTVPG

OeDGAT2-ADG22608.1(190) GNSIVIVVGGAAEALHTVPG

UrDGAT2A-AAK84179.1(196) GNSIVIVVGGAAEALHTVPG

UrDGAT2B-AAK84180.1(188) GNSIVIVVGGAAEALHTVPG

Consensus(317) G S IIVVGGAA ESL PG
