# Supplementary material for: Structure-Function Analysis of Diacylglycerol Acyltransferase Sequences from 70 Organisms
Source: Springer Nature journal article supplement (doi:10.1186/1756-0500-4-249), 2011-07-21
Supplement: 13104_2011_1001_MOESM7_ESM.pdf [file 13104_2011_1001_MOESM7_ESM.pdf]

A

(342) 342 358

AcDGAT2-XP\_003225477.1(247) VTLNRRKGFVKLALRHG

BtDGAT2-DA021853.1(227) VTLNRRKGFVKLALRHG

MmDGAT2-NP\_080660.1(254) VTLNRRKGFVKLALRHG

RnDGAT2-NP\_001012345.1(254) VTLNRRKGFVKLALRHG

HsDGAT2-AAQ88896.1(254) VTLNRRKGFVKLALRHG

PaDGAT2-XP\_002822304.1(254) VTLNRRKGFVKLALRHG

XtDGAT2-NP\_989372.1(227) VTLLQRRKGFVKVALQHG

DrDGAT2-NP\_001025367.1(227) VMLKRRKGFVKLALQKG

IpDGAT2-NP\_001188005.1(227) VTLNRRKGFVKLALQKG

BtDGAT2-XP\_875499.3(272) LTLNRRKGFVRLALRHG

HsDGAT2-NP\_835470.1(207) LTLQKRRKGFVRLALRHG

PtDGAT2-XP\_527842.2(207) LTLQKRRKGFVRLALRHG

DdDGAT2-XP\_635762.1(197) LTLNRRKGFVKLALVHG

PpDGAT2-EFA83646.1(197) LLLKRRKGFVKLALFHG

NvDGAT2-XP\_001630435.1(204) LTLKARYGFIKLAIRNG

NvDGAT2-XP\_001633322.1(205) LTLKERRKGFVKIAMKTG

NvDGAT2-XP\_001635548.1(180) LTLNRRKGFVKYALKHG

TgDGAT2-XP\_002187643.1(202) LLLQKRRKGFVRLALQHG

MdDGAT2-XP\_001365685.1(202) LCLTQRKGFVKMALTHG

CIDGAT2-XP\_002120879.1(202) LLLKQRLGFIKLAITNG

CeDGAT2-NP\_505413.1(216) LTLKRRKGFVKLALQTG

CeDGAT2-NP\_872180.1(206) LTLKRRKGFVKLALQTG

TcDGAT2-XP\_975146.1(207) LLLNRRKGFVKLALRNG

AgDGAT2-NP\_983542.1(326) LVLNKRKGFVKLALETG

SdDGAT2-NP\_014888.1(283) LLLNRRKGFVKLALQTG

SpDGAT2-XP\_001713160.1(211) LVLKRRKGFVKLALFLTG

CrDGAT2-XP\_001694904.1(200) LMLKDRKGFVRLAVEEG

CrDGAT2-XP\_001693189.1(197) AYLSSRRGFVRLAVQHG

OtdGAT2-XP\_003083539.1(198) LYLKRRYGFVKLAIQHG

PpDGAT2-XP\_001758758.1(191) VYLLKRYGFVKVALETG

PpDGAT2-XP\_001777726.1(187) VFLKQRYGFVRIAMEAG

SmDGAT2-XP\_002972054.1(218) VFLKRRKGFVRLALETG

PsDGAT2-ABK26256.1(206) AFLKRRHGFVRLALETG

SpDGAT2-AAQ89590.1(200) AYLKRRHGFVRLALETG

RcDGAT2-XP\_002528531.1(218) AFLKARRGFVRLALETG

VgDGAT2-ACV40232.1(216) VFLSRRKGFVKLALQTV

VfdGAT2-DG356682(200) AFLKARRGFVRLALETG

EoDGAT2-ACO35365.1(205) AFLKARRGFVRLALETG

HvDGAT2-BAJ85730.1(211) AFLKRRKGFVKIAMQSG

OsDGAT2-NP\_001057530(218) AFLKRRKGFVKIAMQSG

OsDGAT2-NP\_001047917(216) AFLKRRKGFVKIAMETG

SbdGAT2-XP\_002452652.1(212) AFLKRRKGFVKIAMETG

ZmDGAT2-NP\_001150174.1(211) AFLPRKGFVKIAMEMG

AtDGAT2-NP\_566952(193) VFLSRRGFVRLALETG

BnDGAT2a-ACO90187(195) VFLSSRRGFVRLALETG

BnDGAT2b-ACO90188(195) VFLSSRRGFVRLALETG

VvDGAT2-XP\_002263626(215) AFLKRRKGFVKIAMEMG

EaDGAT2-ADF57328.1(209) AFLKRRGFVRLALETG

GmDGAT2-ACU20344.1(195) AFLKRRGFVRLALQMG

MtDGAT2-ACJ84867.1(199) AFLKARRGFVRLALEKG

HaDGAT2-ABU50328.1(214) AFLSTRKGFVRLAMETN

OeDGAT2-ADG22608.1(213) AYLKTRRGFVRLALETG

UrdGAT2A-AAK84179.1(219) LVLKRRKGFVKIAMQTV

UrdGAT2B-AAK84180.1(211) LTLKRRKGFVKLALRNG

Consensus(342) L LK RKGFKLAL G

B

(361) 361 376

AcDGAT2-XP\_003225477.1(264) ADLVFVLYSFGENEVYE

BtDGAT2-DA021853.1(244) ADLVFTYSFGENEVYK

MmDGAT2-NP\_080660.1(271) ADLVFTYSFGENEVYK

RnDGAT2-NP\_001012345.1(271) ADLVFTYSFGENEVYK

HsDGAT2-AAQ88896.1(271) ADLVFTYSFGENEVYK

PaDGAT2-XP\_002822304.1(271) ADLVFTYSFGENEVYK

XtDGAT2-NP\_989372.1(244) ADLVFVYSFGENEVYK

DrDGAT2-NP\_001025367.1(244) ADLVFVYSFGENEVYK

IpDGAT2-NP\_001188005.1(244) ADLVFVYSFGENEVYK

BtDGAT2-XP\_875499.3(289) ASLVFVYSFGENDVFR

HsDGAT2-NP\_835470.1(224) ASLVFVYSFGENDVFR

PtDGAT2-XP\_527842.2(224) ASLVFVYSFGENDVFR

DdDGAT2-XP\_635762.1(214) ASLVFVYSFGENDVFR

PpDGAT2-EFA83646.1(214) ASLVFVYSFGENDVFR

NvDGAT2-XP\_001630435.1(221) ASLVFVYAFSGENDVFN

NvDGAT2-XP\_001633322.1(222) ASLVFVYSFGENEVYS

NvDGAT2-XP\_001635548.1(197) ASLVFVYSFGENEVYS

TgDGAT2-XP\_002187643.1(219) TPLVFAFSGENDVFD

MdDGAT2-XP\_001365685.1(219) AYLVVFVFSFGENDLFLY

CIDGAT2-XP\_002120879.1(219) VPLVVFVFSFGDHALWE

CeDGAT2-NP\_505413.1(233) AOLVFCYSFGENDVFN

CeDGAT2-NP\_872180.1(223) AOLVFCYSFGENDVFN

TcDGAT2-XP\_975146.1(224) SPLVVFVFSFGEPFLFD

AgDGAT2-NP\_983542.1(344) INLVFVIYAFSGENDVFN

SdDGAT2-NP\_014888.1(301) VNLVVFVFAFSGEVDVFN

SpDGAT2-XP\_001713160.1(228) SSLVVFVFAFSGESDIE

CrDGAT2-XP\_001694904.1(219) GGLVVFVYHFGNSQLD

CrDGAT2-XP\_001693189.1(214) APLVVFVYHFGQTRAYS

OtdGAT2-XP\_003083539.1(215) AALVVFVYHFGQTRAYK

PpDGAT2-XP\_001758758.1(208) SILVVFVFCFGQTNQYK

PpDGAT2-XP\_001777726.1(204) SPLVVFVFCFGQRNAKYK

SmDGAT2-XP\_002972054.1(235) CPLVVFVFCFGQTEAYK

PsDGAT2-ABK26256.1(223) CPLVVFVFCFGQTEAYK

SpDGAT2-AAQ89590.1(217) SPLVVFVFCFGQNEAFYS

RcDGAT2-XP\_002528531.1(235) KPLVVFVFCFGQSNVYK

VgDGAT2-ACV40232.1(233) TPLVVFVFCFGQHAHTYK

VfdGAT2-DG356682(217) TPLVVFVFCFGQMHTYK

EoDGAT2-ACO35365.1(222) RPLVVFVFCFGQSYVYK

HvDGAT2-BAJ85730.1(228) CPLVVFVFCFGQSKAYK

OsDGAT2-NP\_001057530(235) CPLVVFVFCFGQSYAYK

OsDGAT2-NP\_001047917(233) SPLVVFVFAFGQSYVYK

SbdGAT2-XP\_002452652.1(229) CPLVVFVFAFGQSYVYK

ZmDGAT2-NP\_001150174.1(228) CPLVVFVFAFGQSYVYK

AtDGAT2-NP\_566952(210) SPLVVFVFCFGQARVYK

BnDGAT2a-ACO90187(212) APLVVFVFCFGQSRAYK

BnDGAT2b-ACO90188(212) APLVVFVFCFGQSRAYK

VvDGAT2-XP\_002263626(232) RPLVVFVFCFGQSRVYK

EaDGAT2-ADF57328.1(226) TPLVVFVFCFGQSRVYK

GmDGAT2-ACU20344.1(212) LPLVVFVFCFGQTKAYK

MtDGAT2-ACJ84867.1(216) HPLVVFVFCFGQSDIYK

HaDGAT2-ABU50328.1(231) SPLVVFVFCFGQSYVYK

OeDGAT2-ADG22608.1(230) KPLVVFVFCFGQTNVYK

UrdGAT2A-AAK84179.1(236) ASLVFTYSFGENEVYE

UrdGAT2B-AAK84180.1(228) ASLVFTYSFGENDVYE

Consensus(361) A LVVVFVFSFG E VYK

C

(418) 418 436

AcDGAT2-XP\_003225477.1(321) VPYSKPIITTVGEPITVPK

BtDGAT2-DA021853.1(301) VPYSKPIITTVGEPITVPK

MmDGAT2-NP\_080660.1(328) VPYSKPIITTVGEPITVPK

RnDGAT2-NP\_001012345.1(328) VPYSKPIITTVGEPITVPK

HsDGAT2-AAQ88896.1(328) VPYSKPIITTVGEPITVPK

PaDGAT2-XP\_002822304.1(328) VPYSKPIITTVGEPITVPK

XtDGAT2-NP\_989372.1(321) VPYANPIITTVGEPITVPK

DrDGAT2-NP\_001025367.1(301) VPYCKPIITTVGEPITVPK

IpDGAT2-NP\_001188005.1(301) VPYGKAIITTVGEPITVPK

BtDGAT2-XP\_875499.3(346) MPLARPIITTVGGRPIVPO

HsDGAT2-NP\_835470.1(281) LPLFAVPIITTVGGRPIVPO

PtDGAT2-XP\_527842.2(281) LPLFAVPIITTVGGRPIVPO

DdDGAT2-XP\_635762.1(270) LPLVRHKVITTVGEPIDVPK

PpDGAT2-EFA83646.1(270) LPLVRRKIVSVVGEPIVPO

NvDGAT2-XP\_001630435.1(277) LPLHRKPIITTVVGSPIEVEK

NvDGAT2-XP\_001633322.1(278) LPLHRPIITTVGAPITVEK

NvDGAT2-XP\_001635548.1(253) LPLHRKPICTVVGAPVVKR

TgDGAT2-XP\_002187643.1(275) LPLVRRPICTVVGKPIVPO

MdDGAT2-XP\_001365685.1(275) MPLVRKPIITTVGQPIVPO

CIDGAT2-XP\_002120879.1(275) LPLVRRPIITTVGEPVPO

CeDGAT2-NP\_505413.1(289) LPLFRKPIITTVGAPISVTK

CeDGAT2-NP\_872180.1(279) LPLFRKPIITTVGAPISVTK

TcDGAT2-XP\_975146.1(277) LPLQRRPIITTVGHPVIEVTK

AgDGAT2-NP\_983542.1(400) LPLFRNPIITTVGKPIVYDK

SdDGAT2-NP\_014888.1(357) LPLFRNPIITTVGKPIVYDK

SpDGAT2-XP\_001713160.1(284) MPLVRKPIITTVGEPIDVPK

CrDGAT2-XP\_001694904.1(262) LPLRRNPIITTVGKPIVYDK

CrDGAT2-XP\_001693189.1(265) MPLFRKPIITTVGGRPIVPE

OtdGAT2-XP\_003083539.1(266) LPLVYATPIITTVGELIETQ

PpDGAT2-XP\_001758758.1(254) LPLFRTPITTVYVCKPIEVEK

PpDGAT2-XP\_001777726.1(250) VPLVYRTPITTVYVCKPIEVEK

SmDGAT2-XP\_002972054.1(281) VPLVQEMVYVAVGNPIEVTK

PsDGAT2-ABK26256.1(269) LPLVRRPIITTVGKPIEVEK

SpDGAT2-AAQ89590.1(263) LPLVRSPIITTVGKPIEVEK

RcDGAT2-XP\_002528531.1(281) LPLQRNPIITTVGKPIEVEK

VgDGAT2-ACV40232.1(279) LPLCKNPIITTVVGRPIEVEK

VfdGAT2-DG356682(263) LPLFKNPIITTVVGRPIEVEK

EoDGAT2-ACO35365.1(268) LPLQHPNPIITTVGKPIEVEK

HvDGAT2-BAJ85730.1(274) LPLSSPPIITTVVGRPIEVEK

OsDGAT2-NP\_001057530(281) LPLFRPPIITTVVGRPIEVEK

OsDGAT2-NP\_001047917(279) LPLFRPPIITTVVGRPIEVEK

SbdGAT2-XP\_002452652.1(275) LPLFRPPIITTVVGRPIEVEK

ZmDGAT2-NP\_001150174.1(274) LPLFRPPIITTVVGRPIEVEK

AtDGAT2-NP\_566952(256) LPLCRQPNPIITTVGKPIEVEK

BnDGAT2a-ACO90187(258) LPLVRRPIITTVVGRPIEVEK

BnDGAT2b-ACO90188(258) LPLVRRPIITTVVGRPIEVEK

VvDGAT2-XP\_002263626(278) LPLVRRPPIITTVVGRPIEVEK

EaDGAT2-ADF57328.1(272) LPLVRRPPIITTVVGRPIEVEK

GmDGAT2-ACU20344.1(258) LPLFKNPIITTVVGRPIEVEK

MtDGAT2-ACJ84867.1(262) VPLFRHPIITTVVGRPIEVEK

HaDGAT2-ABU50328.1(277) LPLFRQPNPIITTVGPIEVEK

OeDGAT2-ADG22608.1(276) LPLFRHPIITTVVGRPIEVEK

UrdGAT2A-AAK84179.1(292) LPLFRHPIITTVVGRPIEVEK

UrdGAT2B-AAK84180.1(284) LPLFRHPIITTVVGRPIEVEK

Consensus(418) L P Y R P I T T V V G R P I V P K
