# Supplementary material for: Structure-Function Analysis of Diacylglycerol Acyltransferase Sequences from 70 Organisms
Source: Springer Nature journal article supplement (doi:10.1186/1756-0500-4-249), 2011-07-21
Supplement: 13104_2011_1001_MOESM8_ESM.pdf [file 13104_2011_1001_MOESM8_ESM.pdf]

A

(113) 113 119  
 AcDGAT2-XP\_003225477.1 (73) FVIMGVV  
 BtDGAT2-DAA21853.1 (53) FVILGVV  
 MmDGAT2-NP\_080660.1 (80) FVILGVV  
 RnDGAT2-NP\_001012345.1 (80) FVILGVV  
 HsDGAT2-AAQ88896.1 (80) FVILGVV  
 PaDGAT2-XP\_002822304.1 (80) FVILGVV  
 XtDGAT2-NP\_989372.1 (53) FVILGVV  
 DrDGAT2-NP\_001025367.1 (53) FVIMGMV  
 IpDGAT2-NP\_001188005.1 (53) FVILGVV  
 BtDGAT2-XP\_875499.3 (98) FVFLGPI  
 HsDGAT2-NP\_835470.1 (33) FVFMGPI  
 PtDGAT2-XP\_527842.2 (33) FVFMGPI  
 DdDGAT2-XP\_635762.1 (27) LVPCLIM  
 PpDGAT2-EFA83646.1 (27) VPMCLIM  
 NvDGAT2-XP\_001630435.1 (29) FVFGALL  
 NvDGAT2-XP\_001633322.1 (29) FVFGHLL  
 NvDGAT2-XP\_001635548.1 (5) FVFLGTL  
 TgDGAT2-XP\_002187643.1 (28) FVCLAAV  
 MdDGAT2-XP\_001365685.1 (28) FVMLAKL  
 CIDGAT2-XP\_002120879.1 (27) FVLAATV  
 CeDGAT2-NP\_505413.1 (42) TIFTEPV  
 CeDGAT2-NP\_872180.1 (32) TIFTEPV  
 TcDGAT2-XP\_975146.1 (31) LAFGTFI  
 AgDGAT2-NP\_983542.1 (113) FVYMTLV  
 ScDGAT2-NP\_014888.1 (71) FVLSFHF  
 SpDGAT2-XP\_001713160.1 (37) HVSVSLT  
 CrDGAT2-XP\_001694904.1 (38) YCGMVHV  
 CrDGAT2-XP\_001693189.1 (22) AYTSTV  
 OtDGAT2-XP\_003083539.1 (17) LFHALV  
 PpDGAT2-XP\_001758758.1 (26) GHHLNV  
 PpDGAT2-XP\_001777726.1 (22) GFHNFI  
 SmDGAT2-XP\_002972054.1 (53) AHFNFI  
 PsDGAT2-ABK26256.1 (41) THFDAI  
 SpDGAT2-AAQ89590.1 (36) PIALTAF  
 RcDGAT2-XP\_002528531.1 (53) SHFNFI  
 VgDGAT2-ACV40232.1 (49) SHFIFL  
 VFDGAT2-DG356682 (38) SFHFIF  
 EoDGAT2-ACO35365.1 (40) LHFNVV  
 HvdGAT2-BAJ85730.1 (46) GHFNVL  
 OsDGAT2-NP\_001057530.1 (53) GHFNFI  
 OsDGAT2-NP\_001047917 (51) AHFNFI  
 SbdGAT2-XP\_002452652.1 (47) AHFNFI  
 ZmDGAT2-NP\_001150174.1 (46) AHFNFI  
 AtDGAT2-XP\_566952 (28) AHFNFI  
 BnDGAT2a-ACO90187 (30) AYLNLV  
 BnDGAT2b-ACO90188 (30) AYLNLV  
 VvdGAT2-XP\_002263626 (50) AHFNVA  
 EaDGAT2-ADF57328.1 (44) AHFNVA  
 GmDGAT2-ACU20344.1 (30) AHFNVA  
 MtDGAT2-ACJ84867.1 (34) SHFNFI  
 HaDGAT2-ABU50328.1 (49) SHHLNV  
 OeDGAT2-ADG22608.1 (48) SHFNFI  
 UrdGAT2A-AAK84179.1 (47) MSICMI  
 UrdGAT2B-AAK84180.1 (42) FIPICLI  
 Consensus(113) I V

B

(90) 90 100 110 121  
 AcDGAT2-XP\_003225477.1 (51) TWLRSKSKVEKQVTSVQLQVWVLSFLIMGVACT  
 BtDGAT2-DAA21853.1 (30) TWLRSKSKVEKQVTSVQLQVWVLSFLVVGACS  
 MmDGAT2-NP\_080660.1 (57) TWLRSKSKVEKQVTSVQLQVWVLSFLVVGACS  
 RnDGAT2-NP\_001012345.1 (57) TWLRSKSKVEKQVTSVQLQVWVLSFLVVGACS  
 HsDGAT2-AAQ88896.1 (57) TWLRSKSKVEKQVTSVQLQVWVLSFLVVGACS  
 PaDGAT2-XP\_002822304.1 (57) TWLRSKSKVEKQVTSVQLQVWVLSFLVVGACS  
 XtDGAT2-NP\_989372.1 (30) PWLSKSSVVRHQITSVLQVWVLSFLTLGACT  
 DrDGAT2-NP\_001025367.1 (30) PWLTSKSMVRRHQVTSVQLQVWVLSFLTMGACS  
 IpDGAT2-NP\_001188005.1 (30) PWLSRSKLVKQVQTSVQLQVWVLSFLALGAAAT  
 BtDGAT2-XP\_875499.3 (75) TPSMKTLLKKQVLEVLSTYQYVLCFLFLGPFPS  
 HsDGAT2-NP\_835470.1 (10) PPTSXTLQKQVLEAVGAYQYVLTFLFMGPFPS  
 PtDGAT2-XP\_527842.2 (10) PPTSXTLQKQVLEAVGAYQYVLTFLFMGPFPS  
 DdDGAT2-XP\_635762.1 (4) FVPWNVPLYRRLETTAVVYLVLPVCLMAF  
 PpDGAT2-EFA83646.1 (4) WIPASLPLHRRLETTAVFYLVIVPMCLMAF  
 NvDGAT2-XP\_001630435.1 (6) FAPLRILPHRRLETTAAVALYYSFFFGALGFG  
 NvDGAT2-XP\_001633322.1 (6) WAPVKLFPKRRLETTVLLVHVSFLFGHLGCG  
 NvDGAT2-XP\_001635548.1 (1) -----MCTIFFLGHVLTGT  
 TgDGAT2-XP\_002187643.1 (5) FAPLSVPLQRRQVTSASVAQVIFSFCLACCT  
 MdDGAT2-XP\_001365685.1 (5) FAPLNIPLERRQVGAVALQVIFSFMLAKLWLF  
 CIDGAT2-XP\_002120879.1 (4) FAPLRIPLMRRQVAVSHFVFCFLAALAACT  
 CeDGAT2-NP\_505413.1 (19) WAPLNIPLARRQVTLGALHFFFFITLFTPLVVL  
 CeDGAT2-NP\_872180.1 (9) WAPLNIPLARRQVTLGALHFFFFITLFTPLVVL  
 TcDGAT2-XP\_975146.1 (8) FAPLRIPLARRQVTLGALGWCTFLAFTLGT  
 AgDGAT2-NP\_983542.1 (90) VAPLRIPARRQVTLVVVAWHTSSFFYMTLVLL  
 ScDGAT2-NP\_014888.1 (48) CCLPATPFERRQVTLAVAWHTSSFFYMTLVFTL  
 SpDGAT2-XP\_001713160.1 (14) TPIISKDSRRNLSHWLQALAVFLHVSVLNLTA  
 CrDGAT2-XP\_001694904.1 (23) -----QSIFSSVAMTLFLFYCGMVHVL  
 CrDGAT2-XP\_001693189.1 (1) ---MPLAKLRNVLEYAATAIYVSATYTSVVL  
 OtDGAT2-XP\_003083539.1 (1) -----MSRSVVDHGVLVWVGLFHALVVVV  
 PpDGAT2-XP\_001758758.1 (14) -----LFTLFAVVMVGGVHNLVVLV  
 PpDGAT2-XP\_001777726.1 (10) -----LWSTLAVMVMVGGVGFHNFI  
 SmDGAT2-XP\_002972054.1 (41) -----VLSWIAVNLVGLAHFNFTING  
 PsDGAT2-ABK26256.1 (28) -----GFRSVALIMVGLTHFDAILV  
 SpDGAT2-AAQ89590.1 (23) -----AARSLVATMLVWCPALTAFLC  
 RcDGAT2-XP\_002528531.1 (39) -----NIFHALALSLVWGSVHFNFLV  
 VgDGAT2-ACV40232.1 (35) -----SIPRALSLSLWVGSVHFIKFLV  
 VFDGAT2-DG356682 (24) -----VIFQVSLALAINLGSFHFIFLVLV  
 EoDGAT2-ACO35365.1 (27) -----NFRITVALALVGLLHFNVALV  
 HvdGAT2-BAJ85730.1 (33) -----LPRITVALALVGLLHFNVLV  
 OsDGAT2-NP\_001057530 (40) -----LPRITVALALVGLLHFNFLV  
 OsDGAT2-NP\_001047917 (38) -----PFRITVALALVGLAHFNFLV  
 SbdGAT2-XP\_002452652.1 (34) -----PFRITVALALVGLAHFNFLV  
 ZmDGAT2-NP\_001150174.1 (33) -----PFRITVALALVGLAHFNFLV  
 AtDGAT2-XP\_566952 (14) -----NQFHSITAMAVLGLAHFNFLV  
 BnDGAT2a-ACO90187 (16) -----NIFHVAVALSICLSATYLNALV  
 BnDGAT2b-ACO90188 (16) -----NIFHVAVALSICLSATYLNALV  
 VvdGAT2-XP\_002263626 (27) TVFQGREDDSLHSIAALITVGLAHFNVALV  
 EaDGAT2-ADF57328.1 (32) -----MFRIVVALINLGLAHFNVALV  
 GmDGAT2-ACU20344.1 (17) -----VFKTVALVLYGLAHFNVALV  
 MtDGAT2-ACJ84867.1 (21) -----TFRSIALSLWVGSVHFNALV  
 HaDGAT2-ABU50328.1 (35) -----PLHHTALAMAVLGSVHNLVFLV  
 OeDGAT2-ADG22608.1 (34) -----SIFHTVALVLYGLAHFNFLV  
 UrdGAT2A-AAK84179.1 (24) YAPLRVPLRRQVTLAVLWCSMMSICMFIFF  
 UrdGAT2B-AAK84180.1 (19) APLRGIPLKRRQVTSATVTLVALLPCLITV  
 Consensus(90) L T I A L W L I V L V

C

(476) 476 483  
 AcDGAT2-XP\_003225477.1(374) EAEVLEVN  
 BtDGAT2-DAA21853.1(354) ETEVLEVN  
 MmDGAT2-NP\_080660.1(381) ETEVLEVN  
 RnDGAT2-NP\_001012345.1(381) ETEVLEVN  
 HsDGAT2-AAQ88896.1(381) ETEVLEVN  
 PaDGAT2-XP\_002822304.1(381) ETEVLEVN  
 XtDGAT2-NP\_989372.1(354) DSEMELIV  
 DrDGAT2-NP\_001025367.1(354) ESDTLTTH  
 IpDGAT2-NP\_001188005.1(354) ESDVLETD  
 BtDGAT2-XP\_875499.3(399) ASTHTTFI  
 HsDGAT2-NP\_835470.1(334) ASTCTTFI  
 PtDGAT2-XP\_527842.2(334) ASTCTTFI  
 DdDGAT2-XP\_635762.1(323) ETDKRLIN  
 PpDGAT2-EFA83646.1(322) ESDDKLTH  
 NvDGAT2-XP\_001630435.1(300) KBDKLEIC  
 NvDGAT2-XP\_001633322.1(331) KDVHLEIC  
 NvDGAT2-XP\_001635548.1(307) KETRLTLEIC  
 TgDGAT2-XP\_002187643.1(28) EDSHLEFI  
 MdDGAT2-XP\_001365685.1(328) EQETLEFK  
 CIDGAT2-XP\_002120879.1(327) EBDCKLTI  
 CeDGAT2-NP\_505413.1(342) PPTQLVIN  
 CeDGAT2-NP\_872180.1(332) PTTQLVIN  
 TcDGAT2-XP\_975146.1(331) KDILHEFE  
 AgDGAT2-NP\_983542.1(454) GKELKIVE  
 ScDGAT2-NP\_014888.1(411) EAELEKIVG  
 SpDGAT2-XP\_001713160.1(337) RISEKLS  
 CrDGAT2-XP\_001694904.1(318) LRFPLVSV  
 CrDGAT2-XP\_001693189.1(212) GBEELVSM  
 OtDGAT2-XP\_003083539.1(319) VVDVLC  
 PpDGAT2-XP\_001758758.1(303) ESDPLFYV  
 PpDGAT2-XP\_001777726.1(307) DDTLFLYV  
 SmDGAT2-XP\_002972054.1(334) DTMHLYV  
 PsDGAT2-ABK26256.1(322) PTHRLV  
 SpDGAT2-AAQ89590.1(316) GAERVRLV  
 RcDGAT2-XP\_002528531.1(334) ETLTEFLV  
 VgDGAT2-ACV40232.1(332) ECKLEKLV  
 VFDGAT2-DG356682(316) LKLELFFV  
 EoDGAT2-ACO35365.1(321) EFRRLV  
 HvdGAT2-BAJ85730.1(327) GLHRLV  
 OsDGAT2-NP\_001057530(334) GLHRLV  
 OsDGAT2-NP\_001047917(332) GLHRLV  
 SbdGAT2-XP\_002452652.1(328) LRLRLV  
 ZmDGAT2-NP\_001150174.1(327) LQLRVL  
 AtDGAT2-XP\_566952(308) ECKLEKLV  
 BnDGAT2a-ACO90187(311) LQNLV  
 BnDGAT2b-ACO90188(311) LQNLV  
 VvdGAT2-XP\_002263626(331) LQKLV  
 EaDGAT2-ADF57328.1(325) LHEELV  
 GmDGAT2-ACU20344.1(311) ECKLEKLV  
 MtDGAT2-ACJ84867.1(315) ETELEKIV  
 HaDGAT2-ABU50328.1(330) LQLRVL  
 OeDGAT2-ADG22608.1(329) ECKLV  
 UrdGAT2A-AAK84179.1(348) VKLELEVE  
 UrdGAT2B-AAK84180.1(342) IKDNTMVA  
 Consensus(476) D L L I L
