# Supplementary material for: Structure-Function Analysis of Diacylglycerol Acyltransferase Sequences from 70 Organisms
Source: Springer Nature journal article supplement (doi:10.1186/1756-0500-4-249), 2011-07-21
Supplement: 13104_2011_1001_MOESM9_ESM.pdf [file 13104_2011_1001_MOESM9_ESM.pdf]

A

(353) 353 360 370 383  
 DmDGAT1-NP\_609813.1(183) GHNALILSIYSLSLVHISLCLAVEKGLAMEI I A  
 DmDGAT1-NP\_995724.1(233) GHNALILSIYSLSLVHISLCLAVEKGLAMEI I A  
 TcDGAT1-XP\_975142.1(103) EHF<sup>S</sup>IVLII<sup>L</sup>YSVVP<sup>I</sup>IFCLL<sup>T</sup>ERALAVEI<sup>S</sup> I S  
 BbDGAT1-AAZ22403.1(127) SW<sup>F</sup>ALCLVIVANI<sup>N</sup>FAVA<sup>A</sup>AFQ<sup>V</sup>ERLAVGALT  
 BbDGAT1-NP\_777118.2(127) SW<sup>F</sup>ALCLVIVANI<sup>N</sup>FAVA<sup>A</sup>AFQ<sup>V</sup>ERLAVGALT  
 OaDGAT1-NP\_001103634.1(127) SW<sup>F</sup>ALCLVIVANI<sup>N</sup>FAVA<sup>A</sup>AFQ<sup>V</sup>ERLAVGALT  
 SsDGAT1-NP\_999216.1(127) SW<sup>F</sup>ALCLVIVANV<sup>N</sup>FAVA<sup>A</sup>AFQ<sup>V</sup>ERLAVGALT  
 CfdGAT1-XP\_849176.1(127) SW<sup>F</sup>ALCLVIVANV<sup>N</sup>FAVA<sup>A</sup>AFQ<sup>V</sup>ERLAVGALT  
 CfdGAT1-XP\_858062.1(127) SW<sup>F</sup>ALCLVIVANV<sup>N</sup>FAVA<sup>A</sup>AFQ<sup>V</sup>ERLAVGALT  
 HsDGAT1-NP\_036211.2(130) SW<sup>F</sup>APCLVIAANV<sup>N</sup>FAVA<sup>A</sup>AFQ<sup>V</sup>ERLAVGALT  
 MmDGAT1-XP\_001090134.1(133) SW<sup>F</sup>APCLVIAANV<sup>N</sup>FAVA<sup>A</sup>AFQ<sup>V</sup>ERLAVGALT  
 PtDGAT1-XP\_520014.2(130) SW<sup>F</sup>APCLVIAANV<sup>N</sup>FAVA<sup>A</sup>AFQ<sup>V</sup>ERLAVGALT  
 MmDGAT1-NP\_034176.1(139) SW<sup>F</sup>APCVIIIASNI<sup>N</sup>FVA<sup>A</sup>AFQ<sup>I</sup>EKRLAVGALT  
 RnDGAT1-NP\_445889.1(139) SW<sup>F</sup>APCLIIASNI<sup>N</sup>FIV<sup>A</sup>TFQ<sup>I</sup>EKRLSVGALT  
 OcdGAT1-XP\_002724427.1(146) SW<sup>F</sup>APCLVIVANV<sup>N</sup>FAVA<sup>A</sup>AFQ<sup>V</sup>ERLAVGALT  
 MdDGAT1-XP\_001371565.1(271) SW<sup>F</sup>ISLCLIIIVTNG<sup>N</sup>FLAA<sup>A</sup>AFQ<sup>V</sup>ERCLAKGT<sup>T</sup> I T  
 DrDGAT1-NP\_001002458.1(138) SW<sup>F</sup>EAACLIVICNA<sup>N</sup>ILV<sup>L</sup>LYTERKLAMGST<sup>S</sup> I S  
 DrDGAT1-NP\_956024.1(130) SW<sup>F</sup>EAACLIIIVTNG<sup>N</sup>FLAA<sup>A</sup>LYTERKLSVGT<sup>I</sup> S I S  
 SKDGAT1-XP\_002736160.1(110) SF<sup>N</sup>ENVAVII<sup>L</sup>ALNV<sup>I</sup>FA<sup>T</sup>TFSEFTLLSKKS<sup>S</sup> I S  
 DdDGAT1-XP\_645633.2(253) RNF<sup>G</sup>GV<sup>I</sup>SISLMN<sup>L</sup>PIIA<sup>L</sup>AYLIE<sup>R</sup>AAAKQL<sup>L</sup> P P  
 PpDGAT1-EFA85004.1(241) RNF<sup>G</sup>GV<sup>I</sup>IGLS<sup>N</sup>FI<sup>N</sup>FI<sup>M</sup>AYLIE<sup>R</sup>AAASQN<sup>L</sup> L L P  
 AcDGAT2-EGC41804.1(134) LFLA<sup>L</sup>VPCH<sup>L</sup>LVAYI<sup>I</sup>TER<sup>R</sup>AAHQVKGAI<sup>G</sup>R<sup>K</sup> K  
 PbdGAT1-EEH1710.1(127) LSA<sup>L</sup>IPCH<sup>L</sup>LVFVAI<sup>I</sup>IER<sup>L</sup>AAHQV<sup>R</sup>GAI<sup>G</sup>R<sup>K</sup> K  
 AodGAT2-EEQ31683.1(128) LYLA<sup>L</sup>VPCH<sup>L</sup>LVAYI<sup>I</sup>EL<sup>L</sup>AAKQ<sup>R</sup>GSRKRL<sup>K</sup> K  
 MaDGAT2-EFY86774.1(100) LYFL<sup>I</sup>PCH<sup>L</sup>LVAYI<sup>I</sup>EL<sup>L</sup>AAKQ<sup>R</sup>GSRKRL<sup>K</sup> K  
 MaDGAT2-EFY97444.1(129) LYFL<sup>I</sup>PCH<sup>L</sup>LVAYI<sup>I</sup>EL<sup>L</sup>AAKQ<sup>R</sup>GSRKRL<sup>K</sup> K  
 TgdGAT1-AAP94209.1(164) -WF<sup>M</sup>ELL<sup>C</sup>FL<sup>L</sup>LMHF<sup>C</sup>ILG<sup>A</sup>VIER<sup>F</sup>VAAW<sup>V</sup>PH  
 CvdGAT1-EFN50697.1(74) NLP<sup>L</sup>ILL<sup>L</sup>WPL<sup>L</sup>AC<sup>A</sup>FAL<sup>C</sup>LGIER<sup>F</sup>AH<sup>----</sup> - -  
 PpDGAT1-XP\_001770929.1(94) DW<sup>F</sup>LLM<sup>C</sup>CL<sup>S</sup>LPI<sup>F</sup>FFLA<sup>A</sup>FL<sup>L</sup>VEK<sup>L</sup>LCWK<sup>N</sup>RR<sup>----</sup> - -  
 SmDGAT1-XP\_002964165.1(69) DW<sup>F</sup>LLM<sup>C</sup>CL<sup>S</sup>LPI<sup>F</sup>FLA<sup>A</sup>YVIE<sup>K</sup>IKARR<sup>----</sup> - -  
 OsdGAT1-NP\_001054869.2(185) DW<sup>F</sup>LLM<sup>C</sup>CL<sup>S</sup>PA<sup>F</sup>PLGA<sup>A</sup>FV<sup>E</sup>KLAF<sup>N</sup>NV<sup>I</sup>T  
 SbdGAT1-XP\_002439419.1(162) DW<sup>F</sup>LLM<sup>C</sup>CL<sup>S</sup>LPV<sup>F</sup>FLGA<sup>A</sup>FV<sup>E</sup>KLAF<sup>N</sup>NLI<sup>T</sup> T  
 SbdGAT1-XP\_002437165.1(136) DW<sup>F</sup>LLM<sup>C</sup>CL<sup>T</sup>LPV<sup>F</sup>FLV<sup>L</sup>MAE<sup>R</sup>LIR<sup>R</sup>KL<sup>G</sup> G  
 ZmDGAT1-2-EU039830(140) DW<sup>F</sup>LLM<sup>C</sup>CL<sup>T</sup>LPV<sup>F</sup>FLV<sup>L</sup>MAE<sup>R</sup>LIT<sup>R</sup>KL<sup>G</sup> G  
 VgdGAT1-ABV21945.1(170) DW<sup>F</sup>LLM<sup>C</sup>CL<sup>T</sup>PSD<sup>F</sup>FLA<sup>A</sup>YI<sup>V</sup>EK<sup>L</sup>LAWK<sup>K</sup>R<sup>I</sup> S  
 EpDGAT1-ACO55635.1(120) DW<sup>F</sup>LLM<sup>C</sup>CL<sup>S</sup>PI<sup>F</sup>FLA<sup>A</sup>SFV<sup>E</sup>KL<sup>S</sup>Q<sup>Q</sup>EF<sup>I</sup> S  
 OedGAT1-AA501606.1(179) DW<sup>F</sup>LLM<sup>C</sup>CL<sup>S</sup>PI<sup>F</sup>FLA<sup>A</sup>AFV<sup>E</sup>KLVL<sup>L</sup>KL<sup>S</sup> S  
 PfdGAT1-AAG23696.1(181) DW<sup>F</sup>LLM<sup>C</sup>CL<sup>S</sup>LPV<sup>F</sup>FLA<sup>A</sup>SFV<sup>E</sup>KLVL<sup>K</sup>LN<sup>Y</sup> P  
 NtdGAT1-AAF19345.1(183) DW<sup>F</sup>LLM<sup>C</sup>CL<sup>S</sup>QI<sup>L</sup>FLA<sup>A</sup>FL<sup>L</sup>VEK<sup>L</sup>LAQ<sup>R</sup>HL<sup>T</sup> T  
 AtDGAT1-NP\_179535.1(175) DW<sup>F</sup>LFM<sup>C</sup>CL<sup>S</sup>SI<sup>F</sup>FLA<sup>A</sup>FTV<sup>E</sup>KLVL<sup>Q</sup>KY<sup>I</sup> S  
 BjdGAT1-AAY40784.1(158) DW<sup>F</sup>LFM<sup>C</sup>CL<sup>S</sup>SV<sup>F</sup>FLA<sup>A</sup>FTV<sup>E</sup>KLVL<sup>Q</sup>KY<sup>I</sup> S  
 BndGAT1-AAD45536.1(158) DW<sup>F</sup>LFM<sup>C</sup>CL<sup>S</sup>SV<sup>F</sup>FLA<sup>A</sup>FTV<sup>E</sup>KLVL<sup>Q</sup>KY<sup>I</sup> S  
 BjdGAT2-AAY40785.1(158) DW<sup>F</sup>LFM<sup>C</sup>CL<sup>S</sup>SI<sup>F</sup>FLA<sup>A</sup>FTV<sup>E</sup>KLVL<sup>Q</sup>KY<sup>I</sup> S  
 TmDGAT1-AAM03340.2(167) D<sup>L</sup>SIFM<sup>C</sup>CL<sup>T</sup>PI<sup>F</sup>FLA<sup>A</sup>FI<sup>V</sup>EKL<sup>V</sup>LQ<sup>R</sup>NH<sup>I</sup> S  
 EaDGAT1-AAV31083.1(154) DW<sup>F</sup>LFM<sup>C</sup>CL<sup>T</sup>LPV<sup>F</sup>FLA<sup>A</sup>FL<sup>L</sup>VEK<sup>L</sup>LAQ<sup>R</sup>KN<sup>L</sup> P  
 GmDGAT1-AAS78662.1(145) DW<sup>F</sup>LFM<sup>C</sup>CL<sup>S</sup>LVV<sup>F</sup>FFA<sup>A</sup>FI<sup>V</sup>EKL<sup>A</sup>Q<sup>Q</sup>K<sup>L</sup> P  
 GmDGAT1-BAE93461.1(151) DW<sup>F</sup>LFM<sup>C</sup>CL<sup>S</sup>LVV<sup>F</sup>FFA<sup>A</sup>FI<sup>V</sup>EKL<sup>A</sup>Q<sup>R</sup>K<sup>C</sup> P  
 LjdGAT1-AAW51456.1(157) DW<sup>F</sup>LFM<sup>C</sup>CL<sup>S</sup>LA<sup>I</sup>FFA<sup>A</sup>FV<sup>E</sup>KL<sup>V</sup>Q<sup>Q</sup>K<sup>C</sup> S  
 MtDGAT1-ABN09107.1(185) DW<sup>F</sup>LFM<sup>C</sup>CL<sup>S</sup>LA<sup>I</sup>FFA<sup>A</sup>FV<sup>E</sup>KL<sup>A</sup>Q<sup>Q</sup>K<sup>R</sup> S  
 VvdGAT1-XP\_002279345.1(162) DW<sup>F</sup>LFM<sup>C</sup>CL<sup>T</sup>PI<sup>F</sup>FLA<sup>A</sup>AFV<sup>E</sup>KL<sup>A</sup>Q<sup>Q</sup>K<sup>R</sup> S  
 JcdGAT1-ABB84383.1(166) DW<sup>F</sup>LLM<sup>C</sup>CL<sup>T</sup>PI<sup>F</sup>FLA<sup>A</sup>Y<sup>L</sup>VEK<sup>L</sup>LAY<sup>R</sup>KY<sup>I</sup> S  
 VfdGAT1-DQ356680.1(171) DW<sup>F</sup>LLM<sup>C</sup>CL<sup>T</sup>PI<sup>F</sup>FLA<sup>A</sup>Y<sup>L</sup>VEK<sup>L</sup>LACK<sup>R</sup>Y<sup>I</sup> S  
 RcdGAT1-XP\_002514132.1(171) DW<sup>F</sup>LFM<sup>C</sup>CL<sup>S</sup>LPV<sup>F</sup>FLA<sup>A</sup>Y<sup>L</sup>VEK<sup>L</sup>LAA<sup>R</sup>KY<sup>I</sup> S  
 PtDGAT1-XP\_002308278.1(97) DW<sup>F</sup>LFM<sup>C</sup>CL<sup>S</sup>LPF<sup>A</sup>FFA<sup>A</sup>Y<sup>L</sup>VEK<sup>L</sup>LAY<sup>Q</sup>NY<sup>L</sup> P  
 PtDGAT1-XP\_002330510.1(138) DW<sup>F</sup>LFM<sup>C</sup>CL<sup>S</sup>LPF<sup>A</sup>FFA<sup>A</sup>Y<sup>L</sup>VEK<sup>L</sup>LAY<sup>R</sup>NC<sup>I</sup> S

Consensus(353) WPL MC L L F AAF VEK I

B

(402) 402 410 429  
 DmDGAT1-NP\_609813.1(214) EGLGLF<sup>I</sup>QIV<sup>N</sup>IVVLVCL<sup>L</sup>VV<sup>T</sup>HLK<sup>G</sup>H  
 DmDGAT1-NP\_995724.1(264) EGLGLF<sup>I</sup>QIV<sup>N</sup>IVVLVCL<sup>L</sup>VV<sup>T</sup>HLK<sup>G</sup>H  
 TcDGAT1-XP\_975142.1(134) RRMG<sup>M</sup>MMV<sup>N</sup>LV<sup>L</sup>LV<sup>L</sup>IF<sup>L</sup>PMV<sup>I</sup>HYK<sup>-D</sup>  
 BbDGAT1-AAZ22403.1(158) EQAG<sup>L</sup>LLH<sup>G</sup>VN<sup>L</sup>LATILCF-PA<sup>A</sup>VAF<sup>L</sup>LE  
 BbDGAT1-NP\_777118.2(158) EQAG<sup>L</sup>LLH<sup>G</sup>VN<sup>L</sup>LATILCF-PA<sup>A</sup>VAF<sup>L</sup>LE  
 OaDGAT1-NP\_001103634.1(158) EQAG<sup>L</sup>LLH<sup>G</sup>VN<sup>L</sup>LATILCF-PA<sup>A</sup>VAF<sup>L</sup>LE  
 SsDGAT1-NP\_999216.1(158) EQAG<sup>L</sup>LLH<sup>G</sup>VN<sup>L</sup>LATILCF-PA<sup>A</sup>VAF<sup>L</sup>LE  
 CfdGAT1-XP\_849176.1(158) EQAG<sup>L</sup>LLH<sup>G</sup>VN<sup>L</sup>LATILCF-PA<sup>A</sup>VAF<sup>L</sup>LE  
 CfdGAT1-XP\_858062.1(158) EQAG<sup>L</sup>LLH<sup>G</sup>VN<sup>L</sup>LATILCF-PA<sup>A</sup>VAF<sup>L</sup>LE  
 HsDGAT1-NP\_036211.2(161) EQAG<sup>L</sup>LLH<sup>G</sup>VN<sup>L</sup>LATILCF-PA<sup>A</sup>VAV<sup>L</sup>VE  
 MmDGAT1-XP\_001090134.1(164) EQAG<sup>L</sup>LLH<sup>G</sup>VN<sup>L</sup>LATILCF-PA<sup>A</sup>VV<sup>L</sup>VE  
 PtDGAT1-XP\_520014.2(161) EQAG<sup>L</sup>LLH<sup>G</sup>VN<sup>L</sup>LATILCF-PA<sup>A</sup>VV<sup>L</sup>VE  
 MmDGAT1-NP\_034176.1(170) EQM<sup>G</sup>LLH<sup>G</sup>VN<sup>L</sup>LATII<sup>C</sup>F-PA<sup>A</sup>VAF<sup>L</sup>LE  
 RnDGAT1-NP\_445889.1(170) EQM<sup>G</sup>LLH<sup>G</sup>VN<sup>L</sup>LATII<sup>C</sup>F-PA<sup>A</sup>VAF<sup>L</sup>VE  
 OcdGAT1-XP\_002724427.1(177) FV<sup>G</sup>LLH<sup>G</sup>VN<sup>L</sup>LATV<sup>L</sup>CF-PA<sup>A</sup>VAF<sup>L</sup>VE  
 MdDGAT1-XP\_001371565.1(302) FV<sup>G</sup>LLH<sup>G</sup>MAN<sup>L</sup>ITML<sup>C</sup>F-PA<sup>A</sup>VV<sup>L</sup>MV<sup>K</sup>  
 DrDGAT1-NP\_001002458.1(169) FV<sup>G</sup>LLI<sup>I</sup>YF<sup>N</sup>LTI<sup>I</sup>LCF-PM<sup>-</sup>VV<sup>L</sup>KL<sup>P</sup>  
 DrDGAT1-NP\_956024.1(161) E<sup>R</sup>TGS<sup>F</sup>LV<sup>L</sup>CIN<sup>L</sup>SALL<sup>F</sup>V-PA<sup>G</sup>TV<sup>S</sup>LS  
 SKDGAT1-XP\_002736160.1(141) F<sup>S</sup>VGK<sup>V</sup>NGIN<sup>I</sup>ALIL<sup>L</sup>F-APA<sup>-</sup>ILT<sup>Y</sup>R  
 DdDGAT1-XP\_645633.2(284) DRIC<sup>L</sup>YL<sup>R</sup>IRIN<sup>I</sup>CAAV<sup>I</sup>IV<sup>S</sup>SG<sup>S</sup>IA<sup>F</sup>SP  
 PpDGAT1-EFA85004.1(272) HSM<sup>F</sup>YS<sup>L</sup>IRIN<sup>L</sup>CSGM<sup>V</sup>II<sup>I</sup>STS<sup>V</sup>LV<sup>L</sup>FS<sup>P</sup>  
 AcDGAT2-EGC41804.1(183) WIY<sup>V</sup>VAL<sup>A</sup>TL<sup>N</sup>ACL<sup>L</sup>CLLV<sup>T</sup>S<sup>Y</sup>AV<sup>Y</sup>Y<sup>Y</sup>V<sup>N</sup>  
 PbdGAT1-EEH1710.1(176) WICT<sup>A</sup>FA<sup>S</sup>IN<sup>L</sup>ASL<sup>L</sup>CLLV<sup>T</sup>S<sup>Y</sup>AV<sup>Y</sup>Y<sup>Y</sup>V<sup>N</sup>  
 AodGAT2-EEQ31683.1(177) WY<sup>R</sup>IA<sup>F</sup>AH<sup>T</sup>IN<sup>L</sup>ASL<sup>L</sup>CLLV<sup>T</sup>Y<sup>Y</sup>Y<sup>Y</sup>I<sup>H</sup>  
 MaDGAT2-EFY86774.1(148) WV<sup>L</sup>VAWA<sup>H</sup>GIN<sup>M</sup>TLA<sup>L</sup>AL<sup>T</sup>TFM<sup>V</sup>Y<sup>F</sup>Y<sup>I</sup>H  
 MaDGAT2-EFY97444.1(177) WV<sup>L</sup>VAWA<sup>H</sup>GIN<sup>M</sup>TLA<sup>L</sup>AL<sup>T</sup>TFM<sup>V</sup>Y<sup>F</sup>Y<sup>I</sup>H  
 TgdGAT1-AA94209.1(196) DW<sup>SE</sup>CV<sup>I</sup>IGL<sup>F</sup>ML<sup>F</sup>LV<sup>F</sup>IV<sup>E</sup>LV<sup>T</sup>CN<sup>SS</sup>P  
 CvdGAT1-EFN50697.1(100) --LV<sup>F</sup>L<sup>N</sup>LN<sup>L</sup>TS<sup>A</sup>ALL<sup>A</sup>PC<sup>A</sup>IL<sup>L</sup>H<sup>T</sup>RA  
 PpDGAT1-XP\_001770929.1(125) KWL<sup>I</sup>FV<sup>L</sup>HL<sup>I</sup>IS<sup>V</sup>FG<sup>L</sup>LY<sup>E</sup>GY<sup>V</sup>I<sup>H</sup>RV<sup>Q</sup>S  
 SmDGAT1-XP\_002964165.1(98) ATAV<sup>A</sup>PL<sup>L</sup>LA<sup>L</sup>LA<sup>L</sup>LY<sup>I</sup>Y<sup>V</sup>IEM<sup>F</sup>Q<sup>S</sup>  
 OsdGAT1-NP\_001054869.2(216) DAV<sup>A</sup>TC<sup>L</sup>IF<sup>L</sup>PL<sup>S</sup>TEI<sup>V</sup>Y<sup>V</sup>LV<sup>L</sup>TK<sup>CD</sup>S  
 SbdGAT1-XP\_002439419.1(193) DAA<sup>A</sup>TC<sup>F</sup>IF<sup>L</sup>PL<sup>T</sup>TEI<sup>V</sup>Y<sup>V</sup>LV<sup>L</sup>TK<sup>CD</sup>S  
 SbdGAT1-XP\_002437165.1(167) F<sup>H</sup>VV<sup>L</sup>HL<sup>I</sup>IIT<sup>S</sup>AV<sup>I</sup>V<sup>V</sup>LV<sup>L</sup>TK<sup>CD</sup>S  
 ZmDGAT1-2-EU039830(171) F<sup>H</sup>VV<sup>L</sup>HL<sup>I</sup>IIT<sup>S</sup>AV<sup>I</sup>V<sup>V</sup>LV<sup>L</sup>TK<sup>CD</sup>S  
 VgdGAT1-ABV21945.1(201) F<sup>E</sup>VV<sup>I</sup>TL<sup>H</sup>VI<sup>I</sup>TTT<sup>A</sup>IL<sup>V</sup>F<sup>V</sup>FM<sup>L</sup>RF<sup>DS</sup>  
 EpDGAT1-ACO55635.1(151) EQV<sup>IT</sup>IL<sup>L</sup>AL<sup>I</sup>TTT<sup>V</sup>Y<sup>Y</sup>Y<sup>V</sup>Y<sup>V</sup>LV<sup>L</sup>TR<sup>CD</sup>P  
 OedGAT1-AA501606.1(170) F<sup>CV</sup>AV<sup>L</sup>HL<sup>I</sup>IT<sup>T</sup>AAIL<sup>V</sup>F<sup>V</sup>LV<sup>L</sup>TR<sup>CD</sup>S  
 PfdGAT1-AAG23696.1(212) F<sup>W</sup>VAV<sup>L</sup>LV<sup>IT</sup>TT<sup>T</sup>VEI<sup>L</sup>F<sup>V</sup>VV<sup>L</sup>TR<sup>CD</sup>S  
 NtdGAT1-AAF19345.1(214) F<sup>RA</sup>VT<sup>L</sup>HP<sup>IT</sup>TT<sup>A</sup>AIL<sup>V</sup>F<sup>V</sup>LV<sup>L</sup>TR<sup>CD</sup>S  
 AtDGAT1-NP\_179535.1(206) F<sup>EV</sup>VI<sup>L</sup>HL<sup>I</sup>IIT<sup>T</sup>MEV<sup>L</sup>Y<sup>V</sup>Y<sup>V</sup>LV<sup>L</sup>TR<sup>CD</sup>S  
 BjdGAT1-AAY40784.1(189) F<sup>EV</sup>VAI<sup>L</sup>HL<sup>VI</sup>IT<sup>T</sup>TEV<sup>L</sup>Y<sup>V</sup>Y<sup>V</sup>LV<sup>L</sup>TR<sup>CD</sup>S  
 BndGAT1-AAD45536.1(189) F<sup>EV</sup>VAI<sup>L</sup>HL<sup>VI</sup>IT<sup>T</sup>MEV<sup>L</sup>Y<sup>V</sup>Y<sup>V</sup>LV<sup>L</sup>TR<sup>CD</sup>S  
 BjdGAT2-AAY40785.1(189) F<sup>EV</sup>VII<sup>L</sup>HL<sup>I</sup>IIT<sup>T</sup>MEV<sup>L</sup>Y<sup>V</sup>Y<sup>V</sup>LV<sup>L</sup>TR<sup>CD</sup>S  
 TmDGAT1-AAM03340.2(198) F<sup>L</sup>VAV<sup>L</sup>LV<sup>IT</sup>V<sup>ST</sup>AAV<sup>L</sup>Y<sup>V</sup>Y<sup>V</sup>LV<sup>L</sup>TR<sup>CD</sup>S  
 EaDGAT1-AAV31083.1(185) F<sup>EV</sup>VV<sup>L</sup>HL<sup>I</sup>IT<sup>T</sup>AAV<sup>L</sup>Y<sup>V</sup>Y<sup>V</sup>LV<sup>L</sup>TR<sup>CD</sup>S  
 GmDGAT1-AAS78662.1(176) F<sup>EV</sup>VVV<sup>L</sup>HL<sup>I</sup>IIT<sup>S</sup>ASL<sup>F</sup>Y<sup>V</sup>Y<sup>V</sup>LV<sup>L</sup>TR<sup>CD</sup>S  
 GmDGAT1-BAE93461.1(182) F<sup>EV</sup>VVV<sup>L</sup>HL<sup>I</sup>IIT<sup>S</sup>SL<sup>F</sup>Y<sup>V</sup>Y<sup>V</sup>LV<sup>L</sup>TR<sup>CD</sup>S  
 LjdGAT1-AAW51456.1(188) F<sup>E</sup>-VV<sup>L</sup>HL<sup>I</sup>PI<sup>T</sup>STAAV<sup>L</sup>Y<sup>V</sup>Y<sup>V</sup>LV<sup>L</sup>TR<sup>DS</sup>  
 MtDGAT1-ABN09107.1(216) F<sup>EV</sup>IV<sup>L</sup>LV<sup>IT</sup>TTAAV<sup>I</sup>Y<sup>V</sup>Y<sup>V</sup>LV<sup>L</sup>W<sup>CD</sup>S  
 VvdGAT1-XP\_002279345.1(193) F<sup>Q</sup>VV<sup>V</sup>SL<sup>HL</sup>IIT<sup>T</sup>AAV<sup>L</sup>Y<sup>V</sup>Y<sup>V</sup>LV<sup>L</sup>TR<sup>CD</sup>S  
 JcdGAT1-ABB84383.1(197) AP<sup>I</sup>VIF<sup>F</sup>ML<sup>I</sup>TTTAV<sup>L</sup>Y<sup>V</sup>Y<sup>V</sup>LV<sup>L</sup>SC<sup>GS</sup>  
 VfdGAT1-DQ356680.1(202) AP<sup>T</sup>VY<sup>F</sup>HL<sup>I</sup>FS<sup>T</sup>AAV<sup>L</sup>Y<sup>V</sup>Y<sup>V</sup>LV<sup>L</sup>SC<sup>ES</sup>  
 RcdGAT1-XP\_002514132.1(202) P<sup>D</sup>VI<sup>F</sup>Y<sup>L</sup>HL<sup>I</sup>IIT<sup>S</sup>AV<sup>L</sup>Y<sup>V</sup>Y<sup>V</sup>LV<sup>L</sup>SC<sup>ES</sup>  
 PtDGAT1-XP\_002308278.1(128) OL<sup>V</sup>VV<sup>F</sup>HL<sup>I</sup>IT<sup>T</sup>GS<sup>L</sup>LY<sup>V</sup>Y<sup>V</sup>LV<sup>L</sup>TR<sup>CD</sup>S  
 PtDGAT1-XP\_002330510.1(169) F<sup>L</sup>VV<sup>V</sup>HL<sup>I</sup>IIT<sup>T</sup>ASL<sup>L</sup>Y<sup>V</sup>Y<sup>V</sup>LV<sup>L</sup>TR<sup>CD</sup>S

Consensus(402) E L H N F V I
