# Supplementary material for: Structure-Function Analysis of Diacylglycerol Acyltransferase Sequences from 70 Organisms
Source: Springer Nature journal article supplement (doi:10.1186/1756-0500-4-249), 2011-07-21
Supplement: 13104_2011_1001_MOESM10_ESM.pdf [file 13104_2011_1001_MOESM10_ESM.pdf]

**A****B****C**

(168) 168 188

AcDGAT2-XP\_003225477.1(125) **VWRVFRDYFFPRLAKTHNLLMT**  
 BtDGAT2-DAA21853.1(105) **VWRVFRDYFFPRLAKTHNLLMT**  
 MmDGAT2-NP\_080660.1(132) **VWRVFRDYFFPRLAKTHNLLMT**  
 RnDGAT2-NP\_001012345.1(132) **VWRVFRDYFFPRLAKTHNLLMT**  
 HsDGAT2-AAQ88896.1(132) **VWRVFRDYFFPRLAKTHNLLMT**  
 PaDGAT2-XP\_002822304.1(132) **GWRVFRDYFFPRLAKTHNLLMT**  
 XtDGAT2-NP\_989372.1(105) **VWRVFRDYFFPRLAKTHNLLMT**  
 DrDGAT2-NP\_001025367.1(105) **VWRVFRDYFFPRLAKTHNLLMT**  
 IpDGAT2-NP\_001188005.1(105) **VWRVFRDYFFPRLAKTHNLLMT**  
 BtDGAT2-XP\_875499.3(150) **VWRVFRDYFFPRLAKTHNLLMT**  
 HsDGAT2-NP\_835470.1 (85) **VWRVFRDYFFPRLAKTHNLLMT**  
 PtDGAT2-XP\_527842.2 (85) **VWRVFRDYFFPRLAKTHNLLMT**  
 DdDGAT2-XP\_635762.1 (76) **VWRVFRDYFFPRLAKTHNLLMT**  
 PpDGAT2-EFA83646.1 (76) **VWRVFRDYFFPRLAKTHNLLMT**  
 NvdGAT2-XP\_001630435.1 (82) **VWRVFRDYFFPRLAKTHNLLMT**  
 NvdGAT2-XP\_001633322.1 (83) **VWRVFRDYFFPRLAKTHNLLMT**  
 NvdGAT2-XP\_001635548.1 (58) **VWRVFRDYFFPRLAKTHNLLMT**  
 TgDGAT2-XP\_002187643.1 (80) **VWRVFRDYFFPRLAKTHNLLMT**  
 MddGAT2-XP\_001365685.1 (80) **VWRVFRDYFFPRLAKTHNLLMT**  
 CIDGAT2-XP\_002120879.1 (80) **VWRVFRDYFFPRLAKTHNLLMT**  
 CeDGAT2-NP\_505413.1 (94) **VWRVFRDYFFPRLAKTHNLLMT**  
 CeDGAT2-NP\_872180.1 (84) **VWRVFRDYFFPRLAKTHNLLMT**  
 TcDGAT2-XP\_975146.1 (83) **VWRVFRDYFFPRLAKTHNLLMT**  
 AgDGAT2-NP\_983542.1(164) **VWRVFRDYFFPRLAKTHNLLMT**  
 ScDGAT2-NP\_014888.1(122) **VWRVFRDYFFPRLAKTHNLLMT**  
 SpDGAT2-XP\_001713160.1 (90) **VWRVFRDYFFPRLAKTHNLLMT**  
 CrDGAT2-XP\_001694904.1 (86) **VWRVFRDYFFPRLAKTHNLLMT**  
 CrDGAT2-XP\_001693189.1 (77) **VWRVFRDYFFPRLAKTHNLLMT**  
 OtDGAT2-XP\_003083539.1 (66) **VWRVFRDYFFPRLAKTHNLLMT**  
 PpDGAT2-XP\_001758758.1 (75) **VWRVFRDYFFPRLAKTHNLLMT**  
 PpDGAT2-XP\_001777726.1 (71) **VWRVFRDYFFPRLAKTHNLLMT**  
 SmdGAT2-XP\_002927054.1(102) **VWRVFRDYFFPRLAKTHNLLMT**  
 PsDGAT2-ABK26256.1 (90) **VWRVFRDYFFPRLAKTHNLLMT**  
 SpDGAT2-AAQ89590.1 (84) **VWRVFRDYFFPRLAKTHNLLMT**  
 RcDGAT2-XP\_002528531.1(102) **VWRVFRDYFFPRLAKTHNLLMT**  
 VgDGAT2-ACV40232.1 (98) **VWRVFRDYFFPRLAKTHNLLMT**  
 VfdGAT2-DG356682 (86) **VWRVFRDYFFPRLAKTHNLLMT**  
 EoDGAT2-ACO35365.1 (89) **VWRVFRDYFFPRLAKTHNLLMT**  
 HvdGAT2-BAJ85730.1 (95) **VWRVFRDYFFPRLAKTHNLLMT**  
 OsDGAT2-NP\_001057530(102) **VWRVFRDYFFPRLAKTHNLLMT**  
 OsDGAT2-NP\_001047917(100) **VWRVFRDYFFPRLAKTHNLLMT**  
 SbdGAT2-XP\_002452652.1 (96) **VWRVFRDYFFPRLAKTHNLLMT**  
 ZmDGAT2-NP\_001150174.1 (95) **VWRVFRDYFFPRLAKTHNLLMT**  
 AtDGAT2-NP\_566952 (77) **VWRVFRDYFFPRLAKTHNLLMT**  
 BnDGAT2a-ACO90187 (79) **VWRVFRDYFFPRLAKTHNLLMT**  
 BnDGAT2b-ACO90188 (79) **VWRVFRDYFFPRLAKTHNLLMT**  
 VvDGAT2-XP\_002263626 (99) **VWRVFRDYFFPRLAKTHNLLMT**  
 EaDGAT2-ADF57328.1 (93) **VWRVFRDYFFPRLAKTHNLLMT**  
 GmDGAT2-ACU20344.1 (79) **VWRVFRDYFFPRLAKTHNLLMT**  
 MtdGAT2-ACJ84867.1 (83) **VWRVFRDYFFPRLAKTHNLLMT**  
 HaDGAT2-ABU50328.1 (98) **VWRVFRDYFFPRLAKTHNLLMT**  
 OeDGAT2-ADG22608.1 (97) **VWRVFRDYFFPRLAKTHNLLMT**  
 UrdGAT2A-AAK84179.1 (97) **VWRVFRDYFFPRLAKTHNLLMT**  
 UrdGAT2B-AAK84180.1 (90) **VWRVFRDYFFPRLAKTHNLLMT**

Consensus(168) IWKY YFFPTLV E L

(101) 101 110 121

AcDGAT2-XP\_003225477.1 (61) **LQVLSVQLQWVLSFVIMVACT**  
 BtDGAT2-DAA21853.1 (41) **LQVLSVQLQWVLSFVIMVACT**  
 MmDGAT2-NP\_080660.1 (68) **LQVLSVQLQWVLSFVIMVACT**  
 RnDGAT2-NP\_001012345.1 (68) **LQVLSVQLQWVLSFVIMVACT**  
 HsDGAT2-AAQ88896.1 (68) **LQVLSVQLQWVLSFVIMVACT**  
 PaDGAT2-XP\_002822304.1 (68) **LQVLSVQLQWVLSFVIMVACT**  
 XtDGAT2-NP\_989372.1 (41) **LQVLSVQLQWVLSFVIMVACT**  
 DrDGAT2-NP\_001025367.1 (41) **LQVLSVQLQWVLSFVIMVACT**  
 IpDGAT2-NP\_001188005.1 (41) **LQVLSVQLQWVLSFVIMVACT**  
 BtDGAT2-XP\_875499.3 (86) **LQVLSVQLQWVLSFVIMVACT**  
 HsDGAT2-NP\_835470.1 (21) **LQVLSVQLQWVLSFVIMVACT**  
 PtDGAT2-XP\_527842.2 (21) **LQVLSVQLQWVLSFVIMVACT**  
 DdDGAT2-XP\_635762.1 (15) **LQVLSVQLQWVLSFVIMVACT**  
 PpDGAT2-EFA83646.1 (15) **LQVLSVQLQWVLSFVIMVACT**  
 NvdGAT2-XP\_001630435.1 (17) **LQVLSVQLQWVLSFVIMVACT**  
 NvdGAT2-XP\_001633322.1 (17) **LQVLSVQLQWVLSFVIMVACT**  
 NvdGAT2-XP\_001635548.1 (1) **LQVLSVQLQWVLSFVIMVACT**  
 TgDGAT2-XP\_002187643.1 (16) **LQVLSVQLQWVLSFVIMVACT**  
 MddGAT2-XP\_001365685.1 (16) **LQVLSVQLQWVLSFVIMVACT**  
 CIDGAT2-XP\_002120879.1 (15) **LQVLSVQLQWVLSFVIMVACT**  
 CeDGAT2-NP\_505413.1 (30) **LQVLSVQLQWVLSFVIMVACT**  
 CeDGAT2-NP\_872180.1 (20) **LQVLSVQLQWVLSFVIMVACT**  
 TcDGAT2-XP\_975146.1 (19) **LQVLSVQLQWVLSFVIMVACT**  
 AgDGAT2-NP\_983542.1(101) **LQVLSVQLQWVLSFVIMVACT**  
 ScDGAT2-NP\_014888.1 (59) **LQVLSVQLQWVLSFVIMVACT**  
 SpDGAT2-XP\_001713160.1 (25) **LQVLSVQLQWVLSFVIMVACT**  
 CrDGAT2-XP\_001694904.1 (26) **LQVLSVQLQWVLSFVIMVACT**  
 CrDGAT2-XP\_001693189.1 (10) **LQVLSVQLQWVLSFVIMVACT**  
 OtDGAT2-XP\_003083539.1 (6) **LQVLSVQLQWVLSFVIMVACT**  
 PpDGAT2-XP\_001758758.1 (14) **LQVLSVQLQWVLSFVIMVACT**  
 PpDGAT2-XP\_001777726.1 (10) **LQVLSVQLQWVLSFVIMVACT**  
 SmdGAT2-XP\_002927054.1 (41) **LQVLSVQLQWVLSFVIMVACT**  
 PsDGAT2-ABK26256.1 (29) **LQVLSVQLQWVLSFVIMVACT**  
 SpDGAT2-AAQ89590.1 (24) **LQVLSVQLQWVLSFVIMVACT**  
 RcDGAT2-XP\_002528531.1 (41) **LQVLSVQLQWVLSFVIMVACT**  
 VgDGAT2-ACV40232.1 (37) **LQVLSVQLQWVLSFVIMVACT**  
 VfdGAT2-DG356682 (26) **LQVLSVQLQWVLSFVIMVACT**  
 EoDGAT2-ACO35365.1 (28) **LQVLSVQLQWVLSFVIMVACT**  
 HvdGAT2-BAJ85730.1 (34) **LQVLSVQLQWVLSFVIMVACT**  
 OsDGAT2-NP\_001057530 (41) **LQVLSVQLQWVLSFVIMVACT**  
 OsDGAT2-NP\_001047917 (39) **LQVLSVQLQWVLSFVIMVACT**  
 SbdGAT2-XP\_002452652.1 (35) **LQVLSVQLQWVLSFVIMVACT**  
 ZmDGAT2-NP\_001150174.1 (34) **LQVLSVQLQWVLSFVIMVACT**  
 AtDGAT2-NP\_566952 (16) **LQVLSVQLQWVLSFVIMVACT**  
 BnDGAT2a-ACO90187 (18) **LQVLSVQLQWVLSFVIMVACT**  
 BnDGAT2b-ACO90188 (18) **LQVLSVQLQWVLSFVIMVACT**  
 VvDGAT2-XP\_002263626 (38) **LQVLSVQLQWVLSFVIMVACT**  
 EaDGAT2-ADF57328.1 (32) **LQVLSVQLQWVLSFVIMVACT**  
 GmDGAT2-ACU20344.1 (18) **LQVLSVQLQWVLSFVIMVACT**  
 MtdGAT2-ACJ84867.1 (22) **LQVLSVQLQWVLSFVIMVACT**  
 HaDGAT2-ABU50328.1 (37) **LQVLSVQLQWVLSFVIMVACT**  
 OeDGAT2-ADG22608.1 (36) **LQVLSVQLQWVLSFVIMVACT**  
 UrdGAT2A-AAK84179.1 (35) **LQVLSVQLQWVLSFVIMVACT**  
 UrdGAT2B-AAK84180.1 (30) **LQVLSVQLQWVLSFVIMVACT**

Consensus(101) L T I A L W L I V L V

(361) 361 379

AcDGAT2-XP\_003225477.1(264) **ADLVVPTYSFGENEVYKQVI**  
 BtDGAT2-DAA21853.1(244) **ADLVVPTYSFGENEVYKQVI**  
 MmDGAT2-NP\_080660.1(271) **ADLVVPTYSFGENEVYKQVI**  
 RnDGAT2-NP\_001012345.1(271) **ADLVVPTYSFGENEVYKQVI**  
 HsDGAT2-AAQ88896.1(271) **ADLVVPTYSFGENEVYKQVI**  
 PaDGAT2-XP\_002822304.1(271) **ADLVVPTYSFGENEVYKQVI**  
 XtDGAT2-NP\_989372.1(244) **ADLVVPTYSFGENEVYKQVI**  
 DrDGAT2-NP\_001025367.1(244) **ADLVVPTYSFGENEVYKQVI**  
 IpDGAT2-NP\_001188005.1(244) **ADLVVPTYSFGENEVYKQVI**  
 BtDGAT2-XP\_875499.3(289) **ADLVVPTYSFGENEVYKQVI**  
 HsDGAT2-NP\_835470.1(224) **ADLVVPTYSFGENEVYKQVI**  
 PtDGAT2-XP\_527842.2(224) **ADLVVPTYSFGENEVYKQVI**  
 DdDGAT2-XP\_635762.1(214) **ADLVVPTYSFGENEVYKQVI**  
 PpDGAT2-EFA83646.1(214) **ADLVVPTYSFGENEVYKQVI**  
 NvdGAT2-XP\_001630435.1(221) **ADLVVPTYSFGENEVYKQVI**  
 NvdGAT2-XP\_001633322.1(222) **ADLVVPTYSFGENEVYKQVI**  
 NvdGAT2-XP\_001635548.1(197) **ADLVVPTYSFGENEVYKQVI**  
 TgDGAT2-XP\_002187643.1(219) **ADLVVPTYSFGENEVYKQVI**  
 MddGAT2-XP\_001365685.1(219) **ADLVVPTYSFGENEVYKQVI**  
 CIDGAT2-XP\_002120879.1(219) **ADLVVPTYSFGENEVYKQVI**  
 CeDGAT2-NP\_505413.1(233) **ADLVVPTYSFGENEVYKQVI**  
 CeDGAT2-NP\_872180.1(233) **ADLVVPTYSFGENEVYKQVI**  
 TcDGAT2-XP\_975146.1(224) **ADLVVPTYSFGENEVYKQVI**  
 AgDGAT2-NP\_983542.1(304) **ADLVVPTYSFGENEVYKQVI**  
 ScDGAT2-NP\_014888.1(311) **ADLVVPTYSFGENEVYKQVI**  
 SpDGAT2-XP\_001713160.1(228) **ADLVVPTYSFGENEVYKQVI**  
 CrDGAT2-XP\_001694904.1(219) **ADLVVPTYSFGENEVYKQVI**  
 CrDGAT2-XP\_001693189.1(214) **ADLVVPTYSFGENEVYKQVI**  
 OtDGAT2-XP\_003083539.1(215) **ADLVVPTYSFGENEVYKQVI**  
 PpDGAT2-XP\_001758758.1(208) **ADLVVPTYSFGENEVYKQVI**  
 PpDGAT2-XP\_001777726.1(205) **ADLVVPTYSFGENEVYKQVI**  
 SmdGAT2-XP\_002927054.1(234) **ADLVVPTYSFGENEVYKQVI**  
 PsDGAT2-ABK26256.1(223) **ADLVVPTYSFGENEVYKQVI**  
 SpDGAT2-AAQ89590.1(217) **ADLVVPTYSFGENEVYKQVI**  
 RcDGAT2-XP\_002528531.1(235) **ADLVVPTYSFGENEVYKQVI**  
 VgDGAT2-ACV40232.1(233) **ADLVVPTYSFGENEVYKQVI**  
 VfdGAT2-DG356682(217) **ADLVVPTYSFGENEVYKQVI**  
 EoDGAT2-ACO35365.1(222) **ADLVVPTYSFGENEVYKQVI**  
 HvdGAT2-BAJ85730.1(228) **ADLVVPTYSFGENEVYKQVI**  
 OsDGAT2-NP\_001057530(235) **ADLVVPTYSFGENEVYKQVI**  
 OsDGAT2-NP\_001047917(233) **ADLVVPTYSFGENEVYKQVI**  
 SbdGAT2-XP\_002452652.1(229) **ADLVVPTYSFGENEVYKQVI**  
 ZmDGAT2-NP\_001150174.1(228) **ADLVVPTYSFGENEVYKQVI**  
 AtDGAT2-NP\_566952(210) **ADLVVPTYSFGENEVYKQVI**  
 BnDGAT2a-ACO90187(212) **ADLVVPTYSFGENEVYKQVI**  
 BnDGAT2b-ACO90188(212) **ADLVVPTYSFGENEVYKQVI**  
 VvDGAT2-XP\_002263626(232) **ADLVVPTYSFGENEVYKQVI**  
 EaDGAT2-ADF57328.1(226) **ADLVVPTYSFGENEVYKQVI**  
 GmDGAT2-ACU20344.1(212) **ADLVVPTYSFGENEVYKQVI**  
 MtdGAT2-ACJ84867.1(216) **ADLVVPTYSFGENEVYKQVI**  
 HaDGAT2-ABU50328.1(231) **ADLVVPTYSFGENEVYKQVI**  
 OeDGAT2-ADG22608.1(230) **ADLVVPTYSFGENEVYKQVI**  
 UrdGAT2A-AAK84179.1(236) **ADLVVPTYSFGENEVYKQVI**  
 UrdGAT2B-AAK84180.1(228) **ADLVVPTYSFGENEVYKQVI**

Consensus(361) A LVPVFSFGE EYVK
