# Supplementary material for: Structure-Function Analysis of Diacylglycerol Acyltransferase Sequences from 70 Organisms
Source: Springer Nature journal article supplement (doi:10.1186/1756-0500-4-249), 2011-07-21
Supplement: 13104_2011_1001_MOESM11_ESM.pdf [file 13104_2011_1001_MOESM11_ESM.pdf]

A

|                              | (777)      | 777   | 790       | 801      |
|------------------------------|------------|-------|-----------|----------|
| DmDGAT1-NP_609813.1(525)     | MGNIIIVMAS | -LII  | GQPLC     | IMAYIYHD |
| DmDGAT1-NP_995724.1(575)     | MGNIIIVMAS | -LII  | GQPLC     | IMAYIYHD |
| TcDGAT1-XP_975142.1(452)     | MGNIIIVMAS | -LII  | GQPLC     | IMMYIYHD |
| BbDGAT1-AAZ22403.1(453)      | YGNAAVWLS  | -LII  | GQPVAVI   | IMVYHD   |
| BtDGAT1-NP_777118.2(453)     | YGNAAVWLS  | -LII  | GQPVAVI   | IMVYHD   |
| OaDGAT1-NP_001103634.1(453)  | YGNAAVWLS  | -LII  | GQPVAVI   | IMVYHD   |
| SsDGAT1-NP_999216.1(453)     | YGNAAVWLS  | -LII  | GQPVAVI   | IMVYHD   |
| CfdGAT1-XP_849176.1(462)     | YGNAAVWLT  | -LII  | GQPVAVI   | IMVYHD   |
| CfdGAT1-XP_858062.1(469)     | YGNAAVWLT  | -LII  | GQPVAVI   | IMVYHD   |
| HsDGAT1-NP_036211.2(452)     | YGNAAVWLS  | -LII  | GQPVAVI   | IMVYHD   |
| MmDGAT1-XP_001090134.1(455)  | YGNAAVWLT  | -LII  | GQPVAVI   | IMVYHD   |
| PtDGAT1-XP_520014.2(452)     | YGNAAVWLS  | -LII  | GQPVAVI   | IMVYHD   |
| MmDGAT1-NP_034176.1(463)     | YGNAAVWLT  | -LII  | GQPVAVI   | IMVYHD   |
| RnDGAT1-NP_445889.1(462)     | YGNAAVWVT  | -LII  | GQPVAVI   | IMVYHD   |
| OcDGAT1-XP_002724427.1(467)  | YGNAAVWLT  | -LII  | GQPVAVI   | IMVYHD   |
| MdDGAT1-XP_001371565.1(595)  | YGNAAVWLS  | -LII  | GQPVAVI   | IMVYHD   |
| DrDGAT1-NP_001002458.1(468)  | YGNAAVWLS  | -LII  | GQPVAVI   | IMVYHD   |
| DrDGAT1-NP_956024.1(461)     | YGNAAVWMS  | -LII  | GQPVAVI   | IMVYHD   |
| SKDGAT1-XP_002736160.1(447)  | YSNMIVMWS  | -VII  | GQPVAVIM  | IMVYHD   |
| DdDGAT1-XP_645633.2(527)     | LGNVIFWFS  | -IVL  | GQPMVLLV  | IYRN     |
| PpDGAT1-EFA85004.1(557)      | LGNVIFWFS  | -IVL  | GQPMVLLV  | IYRN     |
| AcDGAT2-EGC41804.1(476)      | IGNCVFVWS  | CLV   | GQPLGALL  | YFFA     |
| PbdGAT1-EHH1710.1(469)       | IGNCVFVWS  | CLV   | GQPLAALL  | YFFA     |
| AoDGAT2-EEQ31683.1(470)      | IGNSVFVWS  | CLV   | GQPLGALL  | YFFA     |
| MaDGAT2-EFY86774.1(461)      | MGNVIFVWS  | TLF   | GQPFAAI   | MYFYA    |
| MaDGAT2-EFY97444.1(490)      | MGNVIFVWS  | TLF   | GQPFAAI   | MYFYA    |
| TgDGAT1-AAP94209.1(497)      | VGNCFWF    | FCFS  | GQPLGII   | IHWYL    |
| CvDGAT1-EFN50697.1(391)      | VGNIFVWFS  | CFV   | GQPLAMII  | IYHD     |
| PpDGAT1-XP_0011770929.1(415) | VGNMIFWFS  | CFIV  | GQPMCLLLY | IYHD     |
| SmDGAT1-XP_002964165.1(387)  | VGNMIFWFS  | CFIV  | GQPMCVLLY | IYHD     |
| OsDGAT1-NP_001054869.2(505)  | VGNMIFWFS  | CFIV  | GQPMCLLLY | IYHD     |
| SbdGAT1-XP_002439419.1(482)  | VGNMIFWFS  | CFIV  | GQPMCVLLY | IYHD     |
| SbdGAT1-XP_002437165.1(456)  | VGNMIFWFS  | CFIV  | GQPMCVLLY | IYHD     |
| ZmDGAT1-2-EU039830(460)      | VGNMIFWFS  | CFIV  | GQPMCVLLY | IYHD     |
| VgDGAT1-ABV21945.1(490)      | VGNMIFWFS  | CFIV  | GQPMCVLLY | IYHD     |
| EpDGAT1-ACO55635.1(440)      | VGNMIFWFS  | CFIV  | GQPMCLLLY | IYHD     |
| OeDGAT1-AA501606.1(499)      | VGNMIFWFS  | CFIV  | GQPMCLLLY | IYHD     |
| PfDGAT1-BA623696.1(501)      | VGNMIFWFS  | CFIV  | GQPMCVLLY | IYHD     |
| NtDGAT1-AAF19345.1(499)      | VGNMIFWFS  | CFIV  | GQPMCVLLY | IYHD     |
| AtDGAT1-NP_179535.1(487)     | VGNMIFWFS  | CFIV  | GQPMCVLLY | IYHD     |
| BjDGAT1-AAY40784.1(470)      | VGNMIFWFS  | CFIV  | GQPMCVLLY | IYHD     |
| BnDGAT1-AAD45536.1(470)      | VGNMIFGS   | ASCFI | GQPMCGLLY | IYHD     |
| BjDGAT2-AAY40785.1(470)      | VGNMIFWFS  | CFIV  | GQPMCVLLY | IYHD     |
| TmDGAT1-AAAM03340.2(487)     | VGNMIFWFS  | CFIV  | GQPMCVLLY | IYHD     |
| EaDGAT1-AAV31083.1(474)      | VGNMIFWFS  | CFIV  | GQPMCLLLY | IYHD     |
| GmDGAT1-AA578662.1(465)      | VGNMIFWFS  | CFIV  | GQPMCVLLY | IYHD     |
| GmDGAT1-BAE93461.1(471)      | VGNMIFWFS  | CFIV  | GQPMCVLLY | IYHD     |
| LjDGAT1-AAW51456.1(476)      | VGNMIFWFS  | CFIV  | GQPMVLLY  | IYHD     |
| MtDGAT1-ABN09107.1(506)      | VGNMIFWFS  | CFIV  | GQPMCVLLY | IYHD     |
| VvDGAT1-XP_002279345.1(482)  | VGNMIFWFS  | CFIV  | GQPMCVLLY | IYHD     |
| JcDGAT1-ABB84383.1(486)      | VGNMIFWFS  | CFIV  | GQPMCVLLY | IYHD     |
| VfDGAT1-DQ356680.1(491)      | VGNMIFWFS  | CFIV  | GQPMCLLLY | IYHD     |
| RcDGAT1-XP_002514132.1(490)  | VGNMIFWFS  | CFIV  | GQPMCVLLY | IYHD     |
| PtDGAT1-XP_002308278.1(417)  | VGNMIFWFS  | CFIV  | GQPMCVLLY | IYHD     |
| PtDGAT1-XP_002330510.1(458)  | VGNMIFWFS  | CFIV  | GQPMCVLLY | IYHD     |
| Consensus(777)               | VGNMIFW    | F I   | GQPMCVLLY | IYHD     |

B

|                              | (486)     | 486          | 500     | 510      | 520        | 530         |            |            |        |           |           |           |        |           |        |        |
|------------------------------|-----------|--------------|---------|----------|------------|-------------|------------|------------|--------|-----------|-----------|-----------|--------|-----------|--------|--------|
| DmDGAT1-NP_609813.1(296)     | GVLN---   | GGEEDEDVS    | ----    | KLQV     | YED        | NLTYKD      | LYFLCA     | APTLCY     |        |           |           |           |        |           |        |        |
| DmDGAT1-NP_995724.1(346)     | GVLN---   | GGEEDEDVS    | ----    | KLQV     | YED        | NLTYKD      | LYFLCA     | APTLCY     |        |           |           |           |        |           |        |        |
| TcDGAT1-XP_975142.1(216)     | DFDSNKNHK | KDKSDDLSNTER | LLVQ    | YED      | NLNLRD     | FYFLCA      | APTLCY     |            |        |           |           |           |        |           |        |        |
| BbDGAT1-AAZ22403.1(231)      | FKRANGG   | -----        | AAQRTVS | YED      | NLTYRD     | LYFLFA      | APTLCY     |            |        |           |           |           |        |           |        |        |
| BtDGAT1-NP_777118.2(231)     | FKRANGG   | -----        | AAQRTVS | YED      | NLTYRD     | LYFLFA      | APTLCY     |            |        |           |           |           |        |           |        |        |
| OaDGAT1-NP_001103634.1(231)  | FKRANGG   | -----        | AAQRTVS | YED      | NLTYRD     | LYFLFA      | APTLCY     |            |        |           |           |           |        |           |        |        |
| SsDGAT1-NP_999216.1(231)     | FKRANGG   | -----        | AAQHSVS | YED      | NLTYRD     | LYFLFA      | APTLCY     |            |        |           |           |           |        |           |        |        |
| CfdGAT1-XP_849176.1(240)     | FKRANGG   | -----        | TAQRVMS | YED      | NLTYRD     | LYFLFA      | APTLCY     |            |        |           |           |           |        |           |        |        |
| CfdGAT1-XP_858062.1(227)     | -----     | AGWALASL     | -----   | PSP      | LPPAD      | LYFLFA      | APTLCY     |            |        |           |           |           |        |           |        |        |
| HsDGAT1-NP_036211.2(230)     | FKASSA    | -----        | AAPHTVS | YED      | NLTYRD     | LYFLFA      | APTLCY     |            |        |           |           |           |        |           |        |        |
| MmDGAT1-XP_001090134.1(233)  | FKASSA    | -----        | AAPHTVS | YED      | NLTYRD     | LYFLFA      | APTLCY     |            |        |           |           |           |        |           |        |        |
| PtDGAT1-XP_520014.2(230)     | FKASSA    | -----        | AAPHTVS | YED      | NLTYRD     | LYFLFA      | APTLCY     |            |        |           |           |           |        |           |        |        |
| MmDGAT1-NP_034176.1(241)     | FKVSGA    | -----        | AAQQAVS | YED      | NLTYRD     | LYFLFA      | APTLCY     |            |        |           |           |           |        |           |        |        |
| RnDGAT1-NP_445889.1(241)     | FKVSGA    | -----        | AAQNTVS | YED      | NLTYRD     | LYFLFA      | APTLCY     |            |        |           |           |           |        |           |        |        |
| OcDGAT1-XP_002724427.1(246)  | FKAIGA    | -----        | AGQCTVS | YED      | NLTYRD     | LYFLFA      | APTLCY     |            |        |           |           |           |        |           |        |        |
| MdDGAT1-XP_001371565.1(374)  | FKRANGD   | -----        | VVSGGVK | YED      | NLTYQD     | LYFLFA      | APTLCY     |            |        |           |           |           |        |           |        |        |
| DrDGAT1-NP_001002458.1(247)  | FKRANGT   | -----        | SMQSVYS | YEG      | LSLRDIY    | LYFLFA      | APTLCY     |            |        |           |           |           |        |           |        |        |
| DrDGAT1-NP_956024.1(240)     | FKRANGT   | -----        | AGYTHVT | YEG      | LSLTHRIY   | LYFLFA      | APTLCY     |            |        |           |           |           |        |           |        |        |
| SKDGAT1-XP_002736160.1(223)  | TIPNGK    | -----        | LSTHLVQ | YED      | NLNLKD     | LYFLFA      | APTLCY     |            |        |           |           |           |        |           |        |        |
| DdDGAT1-XP_645633.2(355)     | -----     | TNTSIV       | FN      | NLSLRSTY | LYFLFA     | APTLCY      |            |            |        |           |           |           |        |           |        |        |
| PpDGAT1-EFA85004.1(342)      | -----     | GDTSV        | FN      | NLSLNTY  | WYMLI      | PTLVY       |            |            |        |           |           |           |        |           |        |        |
| AcDGAT2-EGC41804.1(256)      | -----     | YHSLP        | YRN     | ITIKN    | LYFLFA     | APTLCY      |            |            |        |           |           |           |        |           |        |        |
| PbdGAT1-EHH1710.1(249)       | -----     | YQSCP        | YRN     | VITIGN   | LYFLFA     | APTLCY      |            |            |        |           |           |           |        |           |        |        |
| AoDGAT2-EEQ31683.1(250)      | -----     | YKSCP        | YHN     | VTVSN    | LYFLFA     | APTLCY      |            |            |        |           |           |           |        |           |        |        |
| MaDGAT2-EFY86774.1(221)      | -----     | YSKCP        | YNN     | ITFGN    | LYFLFA     | APTLCY      |            |            |        |           |           |           |        |           |        |        |
| MaDGAT2-EFY97444.1(250)      | -----     | YSKCP        | YNN     | ITFGN    | LYFLFA     | APTLCY      |            |            |        |           |           |           |        |           |        |        |
| TgDGAT1-AAP94209.1(271)      | -----     | EAEHVR       | YR      | YSITL    | LRHYT      | IWMPTM      | F          |            |        |           |           |           |        |           |        |        |
| CvDGAT1-EFN50697.1(173)      | -----     | EBEEL        | YRN     | ITVAAN   | LYFLFA     | APTLCY      |            |            |        |           |           |           |        |           |        |        |
| PpDGAT1-XP_0011770929.1(198) | -----     | ADKIEV       | PH      | LI       | QNTIAY     | FLM         | APTLCY     |            |        |           |           |           |        |           |        |        |
| SmDGAT1-XP_002964165.1(171)  | -----     | P-AID        | YED     | ISLKNIA  | YFLMA      | APTLCY      |            |            |        |           |           |           |        |           |        |        |
| OsDGAT1-NP_001054869.2(288)  | -----     | TVMDN        | LQ      | PPTLGN   | LYFLFA     | APTLCY      |            |            |        |           |           |           |        |           |        |        |
| SbdGAT1-XP_002439419.1(265)  | -----     | VAD          | IDL     | NQ       | APT        | LGSLYFLFA   | APTLCY     |            |        |           |           |           |        |           |        |        |
| SbdGAT1-XP_002437165.1(240)  | -----     | VDP          | ES      | MKDP     | TFKSLYFLFA | APTLCY      |            |            |        |           |           |           |        |           |        |        |
| ZmDGAT1-2-EU039830(244)      | -----     | VDP          | EN      | MKDP     | TFKSLYFLFA | APTLCY      |            |            |        |           |           |           |        |           |        |        |
| VgDGAT1-ABV21945.1(274)      | -----     | SN           | MD      | FY       | DV         | NFKSLYFLFA  | APTLCY     |            |        |           |           |           |        |           |        |        |
| EpDGAT1-ACO55635.1(224)      | -----     | SME          | DC      | SF       | EVN        | FQA         | LYFLFA     | APTLCY     |        |           |           |           |        |           |        |        |
| OeDGAT1-AA501606.1(283)      | -----     | WNS          | DD      | S        | GAS        | FQSLYFLFA   | APTLCY     |            |        |           |           |           |        |           |        |        |
| PfDGAT1-BA623696.1(285)      | -----     | WNL          | DD      | A        | YD         | VNFKSLYFLFA | APTLCY     |            |        |           |           |           |        |           |        |        |
| NtDGAT1-AAF19345.1(286)      | -----     | DFS          | YD      | V        | S          | FKSLYFLFA   | APTLCY     |            |        |           |           |           |        |           |        |        |
| AtDGAT1-NP_179535.1(275)     | -----     | EVS          | YV      | S        | LKSLYFLFA  | APTLCY      |            |            |        |           |           |           |        |           |        |        |
| BjDGAT1-AAY40784.1(258)      | -----     | EIS          | YV      | S        | LKSLYFLFA  | APTLCY      |            |            |        |           |           |           |        |           |        |        |
| BnDGAT1-AAD45536.1(258)      | -----     | EIS          | YV      | S        | LKSLYFLFA  | APTLCY      |            |            |        |           |           |           |        |           |        |        |
| BjDGAT2-AAY40785.1(258)      | -----     | EVS          | YV      | S        | LKSLYFLFA  | APTLCY      |            |            |        |           |           |           |        |           |        |        |
| TmDGAT1-AAAM03340.2(270)     | -----     | STI          | V       | S        | C          | YD          | NFKSLYFLFA | APTLCY     |        |           |           |           |        |           |        |        |
| EaDGAT1-AAV31083.1(258)      | -----     | QNMD         | ---     | S        | F          | D           | V          | NFKSLYFLFA | APTLCY |           |           |           |        |           |        |        |
| GmDGAT1-AA578662.1(249)      | -----     | LNMD         | ---     | Y        | S          | V           | N          | F          | S      | LKSLYFLFA | APTLCY    |           |        |           |        |        |
| GmDGAT1-BAE93461.1(255)      | -----     | LNMD         | ---     | Y        | S          | V           | N          | F          | S      | LKSLYFLFA | APTLCY    |           |        |           |        |        |
| LjDGAT1-AAW51456.1(260)      | -----     | LNMD         | ---     | Y        | S          | D           | V          | N          | F      | S         | LKSLYFLFA | APTLCY    |        |           |        |        |
| MtDGAT1-ABN09107.1(289)      | -----     | FN           | M       | E        | E          | Y           | H          | N          | F      | S         | F         | Q         | S      | LKSLYFLFA | APTLCY |        |
| VvDGAT1-XP_002279345.1(266)  | -----     | LNMD         | ---     | Y        | S          | D           | V          | N          | F      | S         | LKSLYFLFA | APTLCY    |        |           |        |        |
| JcDGAT1-ABB84383.1(270)      | -----     | SGAD         | ---     | SS       | R          | D           | V          | N          | F      | S         | LKSLYFLFA | APTLCY    |        |           |        |        |
| VfDGAT1-DQ356680.1(275)      | -----     | SSAE         | ---     | SS       | H          | D           | V          | N          | F      | S         | LKSLYFLFA | APTLCY    |        |           |        |        |
| RcDGAT1-XP_002514132.1(274)  | -----     | SSTE         | ---     | N        | C          | H           | D          | V          | N      | F         | S         | LKSLYFLFA | APTLCY |           |        |        |
| PtDGAT1-XP_002308278.1(201)  | -----     | PYVG         | ---     | N        | Y          | D           | T          | Y          | F      | K         | S         | LKSLYFLFA | APTLCY |           |        |        |
| PtDGAT1-XP_002330510.1(242)  | -----     | SKAD         | ---     | NS       | Y          | D           | A          | N          | F      | K         | S         | LKSLYFLFA | APTLCY |           |        |        |
| Consensus(486)               |           |              |         |          | Y P N      |             |            |            |        |           |           |           |        |           | I Y F  | APTLCY |
