# Supplementary figures and images for: Structure-Function Analysis of Diacylglycerol Acyltransferase Sequences from 70 Organisms
Source: Springer Nature journal article supplement (doi:10.1186/1756-0500-4-249), 2011-07-21

A

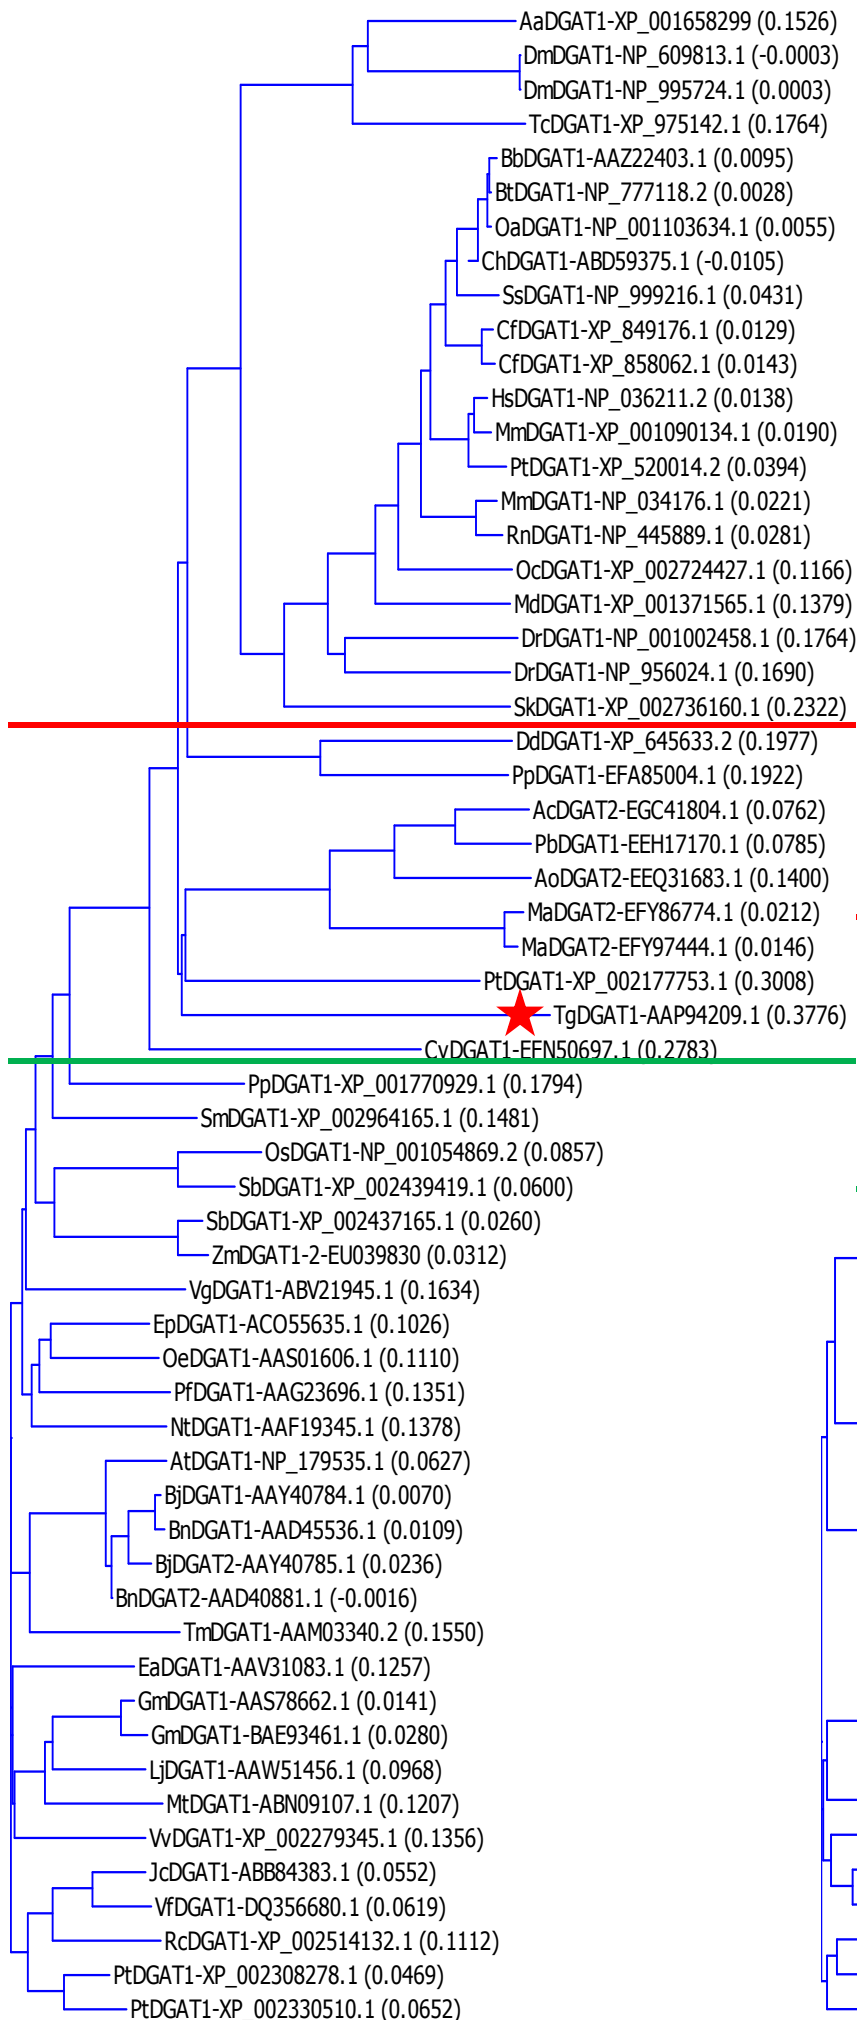

B

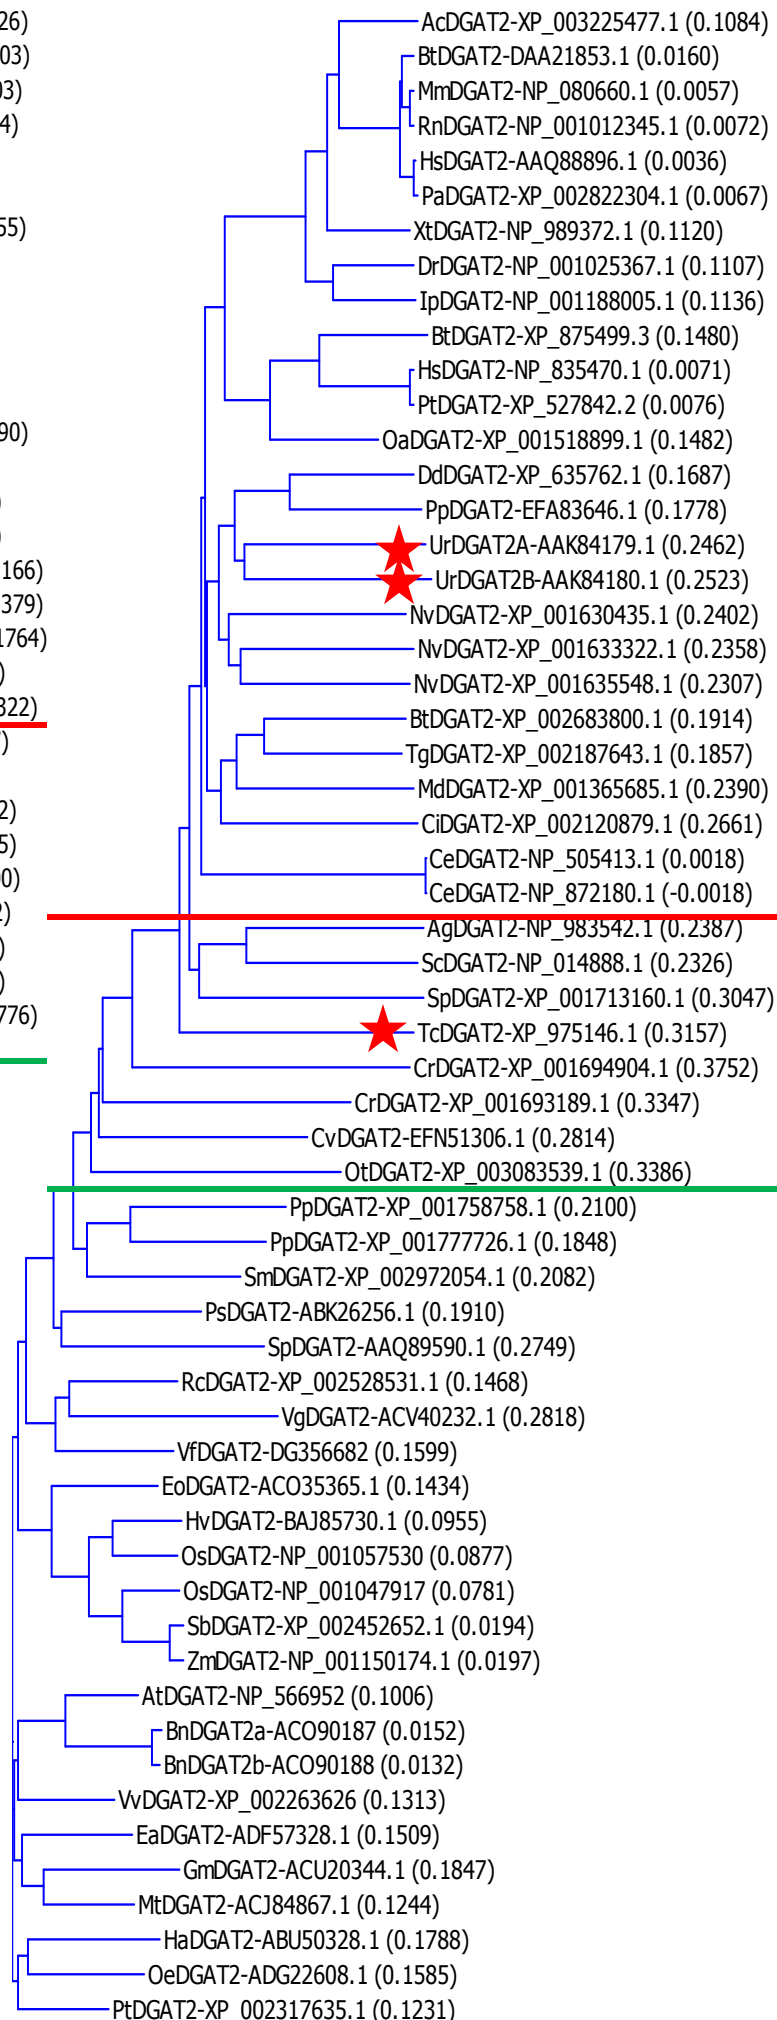

Supplement: 13104_2011_1001_MOESM1_ESM.pdf [file 13104_2011_1001_MOESM1_ESM.pdf]
